1 Widespread dysregulation of long non-coding genes associated with fatty acid metabolism, cell  
2 division, and immune response gene networks in xenobiotic-exposed rat liver

3  
4 Kritika Karri and David J. Waxman\*

5 Dept. of Biology and Bioinformatics Program, Boston University  
6 Boston, MA 02215 USA

7  
8 \*Address correspondence to:

9 Dr. David J. Waxman  
10 Department of Biology  
11 5 Cummington Mall  
12 Boston, MA 02215 USA  
13

14 Competing Financial Interests: This work is supported in part by NIH grant ES 024421 (to DJW). The  
15 authors declare they have no other actual or potential competing financial interests.

16  
17 **Abstract**

18 Xenobiotic exposure activates or inhibits transcription of hundreds of protein-coding genes in  
19 mammalian liver, impacting many physiological processes and inducing diverse toxicological  
20 responses. Little is known about the effects of xenobiotic exposure on long noncoding RNAs  
21 (lncRNAs), many of which play critical roles in regulating gene expression. Objective: to develop a  
22 computational framework to discover liver-expressed, xenobiotic-responsive lncRNAs (xeno-lnc)  
23 with strong functional, gene regulatory potential and elucidate the impact of xenobiotic exposure on  
24 their gene regulatory networks. We analyzed 115 liver RNA-seq data sets from male rats treated with  
25 27 individual chemicals representing seven mechanisms of action (MOAs) to assemble the long non-  
26 coding transcriptome of xenobiotic-exposed rat liver. Ortholog analysis was combined with co-  
27 expression data and causal inference methods to infer lncRNA function and deduce gene regulatory  
28 networks, including causal effects of lncRNAs on protein-coding gene expression and biological  
29 pathways. We discovered >1,400 liver-expressed xeno-lnc, many with human and/or mouse  
30 orthologs. Xenobiotics representing different MOAs were often regulated common xeno-lnc targets:  
31 123 xeno-lnc were dysregulated by at least 10 chemicals, and 5 xeno-lnc responded to at least 20 of  
32 the 27 chemicals investigated. 81 other xeno-lnc served as MOA-selective markers of xenobiotic  
33 exposure. Xeno-lnc—protein-coding gene co-expression regulatory network analysis identified xeno-  
34 lnc closely associated with exposure-induced perturbations of hepatic fatty acid metabolism, cell  
35 division, and immune response pathways. We also identified hub and bottleneck lncRNAs, which are  
36 expected to be key regulators of gene expression in *cis* or in *trans*. This work elucidates extensive  
37 networks of xeno-lnc—protein-coding gene interactions and provides a framework for understanding  
38 the extensive transcriptome-altering actions of diverse foreign chemicals in a key responsive  
39 mammalian tissue.  
40

## 41 Introduction

42 Many industrial chemicals, drugs, environmental toxicants, and other foreign chemicals, collectively  
43 known as xenobiotics, have adverse effects on humans and other species [1, 2]. Mammalian liver is a  
44 key xenobiotic-responsive tissue: it undergoes major changes in gene expression and the epigenetic  
45 landscape, which impacts many biological pathways and induces diverse toxicological responses.  
46 Many of these responses are mediated by nuclear receptors or other transcription factors that bind  
47 foreign chemicals directly, or whose activity is indirectly altered by xenobiotic exposure [3] or by  
48 other mechanisms of action (MOAs) [4-6]. Elucidation of the gene targets, gene expression networks,  
49 and MOAs of xenobiotics is critical for the evaluation and interpretation of toxicological outcomes  
50 and hazard risk assessment.

51 Long noncoding RNAs (lncRNAs) comprise a significant fraction of the mammalian transcriptome and  
52 are often expressed in a highly tissue-specific or condition-dependent manner. lncRNAs act by  
53 diverse mechanisms to exert regulatory effects [7], including transcriptional, epigenetic and  
54 translational control of gene expression [8]. Many lncRNA genes are responsive to endogenous  
55 hormones [9, 10] or to environmental factors in mouse liver, as we recently observed in mice  
56 exposed to TCPOBOP, an agonist ligand of the nuclear receptor constitutive androstane receptor  
57 (CAR) [11]. It is unclear, however, whether lncRNAs respond to xenobiotics that activate receptors  
58 controlling other biological pathways, such as peroxisome proliferator-activated receptor  $\alpha$  or  $\gamma$   
59 (PPARA, PPARG), estrogen receptor (ER), and aryl hydrocarbon receptor (AhR), or to xenobiotics that  
60 act by other MOAs, including DNA damage or cytotoxicity (**Scheme 1**). lncRNA responses to chemical  
61 exposures may be MOA-specific, or alternatively, lncRNAs may respond in common to diverse  
62 chemicals that act via distinct MOAs. Further, the biological pathways associated with xenobiotic-  
63 responsive lncRNAs are almost totally unknown. Gain-of-function [12] and loss-of-function studies  
64 [13] have been used in cell culture screens to identify lncRNAs required for cell growth and drug  
65 resistance [13, 14], but such screens are not readily implemented in intact animal models. Given the  
66 widespread effects that at least some xenobiotics have on lncRNA expression [11], there is a critical  
67 need for a systematic, genome-wide approach to identify lncRNAs that respond to diverse  
68 xenobiotics in vivo, including chemicals that act via different MOAs, and to discover the biological  
69 pathways and pathological responses they may control.

70 Here, we use RNA-seq datasets from livers of male Sprague-Dawley rats exposed to one of 27  
71 different xenobiotics representing seven distinct MOAs [6, 15] to discover several thousand novel  
72 liver-expressed lncRNAs and elucidate their responses to xenobiotic exposure. We identify 81 MOA-  
73 selective lncRNAs, as well as hundreds of lncRNAs that respond in common to xenobiotics acting  
74 through different MOAs. Further, we implement powerful data-driven approaches (**Figure 1**) for gene  
75 co-expression and network analysis to identify xenobiotic-responsive gene modules enriched in  
76 diverse cellular processes and to discover xenobiotic-responsive lncRNAs that occupy key regulatory  
77 points for important biological pathways commonly perturbed in xenobiotic-exposed mammalian  
78 liver.

79

## 80 Materials and Methods

81 **lncRNA discovery** – 115 RNA-seq datasets from livers of male Sprague-Dawley rats exposed to one of  
82 27 individual chemicals representing 7 MOAs (**Table S1**) were downloaded from GSE47792 [6].

83 Sequence reads were mapped to the rat genome (rn6) [16] using TopHat2 [17] with default  
84 parameters, including multi-mappable reads. Mapping rates ranged from 65-95% across samples.  
85 Cufflinks and Cuffmerge [18] were used to assemble a transcriptome comprised of both coding and  
86 non-coding transcripts. Transcript annotation for lncRNAs was based on three key features: transcript  
87 length >200 nt, low or no coding potential, and absence of overlap with known protein-coding genes  
88 (PCGs) [19]. Two approaches were used for lncRNAs discovery. Approach 1 [9]: First, transcripts that  
89 do not contain the above three key lncRNA features were filtered out. Thus, the 144,636 rat liver  
90 transcripts generated by Cufflinks were scanned for genes that overlap known RefSeq gene  
91 annotations. Transcripts exhibiting similarities to PCGs based on their coding potential and codon  
92 degeneracy were removed. Transcripts were converted into mature RNA sequences by exon  
93 concatenation, translated using all six open reading frames, then evaluated for the presence of  
94 protein-domain like regions (Pfam) using HMMER [20]. PhyloCSF [21] was used to identify  
95 evolutionary signatures with characteristic alignments of conserved coding regions and to distinguish  
96 PCGs from non-coding lncRNAs based on synonymous codon substitution frequencies and  
97 conservative amino acid substitutions. The coding potential of each genomic region was evaluated  
98 based on a log-likelihood ratio: transcripts with a positive score have an increased likelihood of  
99 coding for a functional protein and were discarded. The second filter excluded transcripts expressed  
100 below a fragment per kilobase length per million sequence reads (FPKM) cutoff tailored for each  
101 RNA-seq sample, which are likely to have truncated gene boundaries [9]. Genes longer than 200 nt  
102 were retained in the final set of rat liver lncRNAs. Approach 2: We used the lncRNA discovery tool  
103 Slacky [22] to identify an initial set of lncRNAs from the same 115 RNA-seq samples, filtered to  
104 remove known pseudogenes, PCGs, and artifacts from transcript assembly, and then assessed the  
105 coding potential for small peptides or novel proteins. Slacky excludes transcripts that overlap  
106 unannotated PCGs or incomplete transcripts that align to untranslated region sequences. Next, it  
107 aligns putative lncRNAs to syntenic non-coding transcripts in other, related species. Slacky then scans  
108 each significant alignment and reports back any aligned open reading frame >30 base pairs, then  
109 calculates its non-synonymous to synonymous substitution (dN/dS) ratio. Transcripts with dN/dS >1  
110 have significant coding potential and are excluded. Bedtools [23] was used to determine the overlap  
111 between the lncRNAs discovered using Approach 1 and Approach 2 to obtain a combined set of 5,795  
112 lncRNAs (Table S2), which includes 3,342 RNA transcripts common to both lncRNA discovery  
113 pipelines. 2,164 (37%) of the 5,795 lncRNAs are multi-exonic sequences.

114 **Expression quantification and clustering analysis** - The full set of 115 rat liver RNA-seq samples was  
115 analyzed using a standard RNA-seq analysis pipeline. Sequence reads were mapped to the reference  
116 rat genome (rn6) using TopHat2 (v2.0.13). FeatureCounts v.1.4.6 [24] was used for read counting for  
117 both RefSeq genes (PCGs), and exon-collapsed regions of lncRNAs using a custom GTF file, available in  
118 Supplementary Materials (Rat\_Liver\_lncRNA.gtf). EdgeR [25] was used to identify 2,637 PCGs and  
119 1,447 lncRNAs (xeno-lncs) that showed significant differential expression in any of the 27 chemical  
120 exposure datasets, based on these thresholds: gene up-regulation or down-regulation by at least one  
121 chemical at |fold-change (FC)| > 4, FPKM > 0.5, and Benjamini-Hochberg corrected false discovery  
122 rate (FDR) < 0.05. Differential expression data is available in Table S3A (xeno-lncs) and Table S3B  
123 (PCGs). Hierarchical clustering using Euclidean distance metric and Ward.d2 minimum variance  
124 criterion was used for clustering analysis.

125 **Ortholog discovery and multi-species comparisons** - Primary sequence conservation was combined  
126 with syntenic conservation to discover lncRNA orthologs in the mouse and human genome, as  
127 implemented using Slacky [22]. For mouse orthologs, we considered a set of 15,558 mouse liver-  
128 expressed lncRNAs [10, 11] plus 18,065 mouse lncRNAs found in GENCODE (version M21) and 87,774

129 lncRNAs in NONCODE (v5). For human orthologs we considered 18,151 lncRNAs in GENCODE (version  
130 21), 96,308 lncRNAs in NONCODE (v5) [7], and 662 human lncRNAs involved in cancer (onco-lncs) that  
131 we curated from PubMed. NONCODE (v5) [26] (<http://www.noncode.org/>) integrates annotations from  
132 LNCipedia [27] (<https://lncipedia.org/>), lncRNAWiki [28] and manual searches. Slcnky uses two metrics  
133 to characterize the conservation properties of lncRNA orthologs: transcript-genome identity (TGI;  
134 percent of identical, aligning nt between a rat lncRNA and a non-transcribed locus in a syntenic region in  
135 the mouse, or human, genome); and transcript-transcript identity (TTI; percentage of identical, aligning  
136 nt present in the exonic regions of lncRNAs in both species). A TGI or TTI threshold of 30% conservation  
137 of the rat lncRNA sequence was used to define lncRNA orthologs. Putative functions for rat lncRNAs  
138 were deduced from GENCODE or NONCODE annotations [29] or from our PubMed searches for the 774  
139 of 1,447 rat liver xeno-lncs that shared orthology with mouse lncRNAs (267 orthologs), human lncRNAs  
140 (179 orthologs), or both mouse and human lncRNAs (328 orthologs) (**Table S4**). 140 rat-mouse lncRNA  
141 ortholog pairs that respond to CAR or PXR in both species were identified as follows. First, we  
142 considered the set of 2,029 CAR/PXR-responsive rat liver lncRNAs defined at a relaxed threshold of  
143  $|FC| > 2$  at FDR  $< 0.05$  (**Table S5A**). Of these, 381 are orthologous to one of the 15,558 mouse liver-  
144 expressed lncRNAs that we described earlier [10, 11]. Next, we identified the subset of these 381  
145 CAR/PXR-responsive rat xeno-lncs that is found in at least one of two sets of CAR/PXR-responsive  
146 mouse liver lncRNAs, which we discovered by analyzing published RNA-seq data for expression of the  
147 above 15,558 mouse liver-expressed lncRNAs. Set 1 = 1,166 mouse liver lncRNAs that respond at  $|FC| > 2$   
148 at FDR  $< 0.05$  to either pregnenolone 16 $\alpha$ -carbonitrile (mouse PXR activator) or TCPOBOP (mouse CAR  
149 activator, after 3 or 27 h) [11]; and Set 2 = 1,339 mouse liver lncRNAs that respond at  $|FC| > 2$  and FDR  
150  $< 0.05$  to TCPOBOP or to the human CAR activator CITCO after a multi-day exposure in mice at either 5  
151 or 60 days of age (GSE98666) [30] (**Table S5B**). A total of 140 CAR/PXR-responsive rat lncRNAs had a  
152 mouse ortholog that responded to CAR or PXR activation in at least one of the mouse datasets (**Table**  
153 **S5C**).

154 **Tissue-specific co-expression networks** - We used two complementary methods that employ  
155 hierarchical clustering based on gene co-expression data to assign co-regulated rat liver lncRNAs and  
156 PCGs to co-expression network modules. Weighted Gene Co-expression Network Analysis (WGCNA)  
157 [31] uses an agglomerative (bottom-up) clustering approach starting with a similarity matrix  $S$ , which  
158 is comprised of Pearson correlation values for each gene pair  $i$  and  $j$ , defined as  $s_{ij} = |\text{cor}(i,j)|$ . We  
159 transformed the similarity matrix into an unsigned adjacency matrix  $A$  by raising the correlation  
160 values to a power ('soft' threshold):  $a_{ij} = s_{ij}^\beta$  with  $\beta \geq 1$ . The power  $\beta$ , which produces a higher  
161 similarity with a scale-free network, was used to emphasize strong correlations and punish weak  
162 correlations on an exponential scale. We selected the parameter  $\beta=12$  using the pickSoftThreshold  
163 function in the WGCNA R package. Next, the adjacency matrix was converted into a distance measure  
164 (dissTOM = 1-Topological Overlap Matrix), which calculates the edge weight between two nodes  
165 based on its network neighbors and minimizes the effects of noise and spurious associations [32].  
166 Ultimately, we identified eight rat liver xeno-gene/xeno-lnc co-expression modules (**Table S6A**) by  
167 applying the branch cutting method dynamic TreeCut [33]. WGCNA is superior in finding biological  
168 relevant modules, but has two major limitations: modules are often large, which complicates  
169 downstream refinement of biological processes; and each gene can only be assigned to a single  
170 module, which may not fully capture the complex biology, where individual genes play essential roles  
171 in more than one biological process. The second method, Multiscale Embedded Gene Co-expression  
172 Network Analysis (MEGENA) [34], addresses these limitations and generates more compact and more  
173 coherent modules, where genes can be assigned to multiple modules. MEGENA uses a divisive (top-  
174 down) approach based on the shortest path distance measure and k-medoids clustering, which finds  
175  $k$  optimal clusters at each step by minimizing the distance within each cluster to define a more

176 compact gene set. The clustering process continues until no further compact child clusters are  
177 formed. We used the R package MEGENA to discover 89 compact modules using the 2,637 significant  
178 PCGs and 1,447 significant xeno-lncs as input (**Figure S1, Table S6B**).

179 **Functional enrichment of network modules** - DAVID Bioinformatics Resources 6.7 [35] was used to  
180 identify functional features of the co-expression modules discovered using WGCNA (N=8) and  
181 MEGENA (N=89). PCGs from each module were enriched for Gene Ontology terms and KEGG pathway  
182 terms (ES>1.3 and FDR<0.05) to characterize each module. Module enrichment was automated using  
183 RDAVIDWebService [36]. We labeled genes in each gene module to mark oncogenic gene drivers and  
184 tumor suppressor genes, based on a listing of 3,516 such genes that we curated from multiple  
185 sources (**Table S7**): (1) Introgen [37] collects and analyzes somatic mutations in thousands of tumor  
186 genomes to identify cancer driver genes; we identified 952 drivers with 157 druggable targets,  
187 including 689 drivers of hepatocellular carcinoma; (2) 588 tumor suppressor genes/oncogenes from  
188 Network of Cancer Genes, v6.0 [38]; (3) 1,018 genes from TSGene Database [39]; (4) 2,579 human  
189 cancer genes (allOnco; <http://www.bushmanlab.org/links/genelists>); (5) Cancer Gene Census  
190 catalogue, which includes genes mutations causally implicated in cancer, yielded 574 drivers or tumor  
191 suppressor genes under tier1 (i.e., gene with documented activity from experiments or literature  
192 relevant to cancers); and (6) list of 34 verified drivers and tumor suppressor genes for hepatocellular  
193 carcinoma [40].

194 **Hubs genes and bottlenecks ranking scheme** - Biologically relevant modules based on functional  
195 enrichment results were visualized as networks using Cytoscape (v6.7) [41]. Each PCG or lncRNA is  
196 represented by a node and an edge represents a correlation value. MEGENA uses Fast Planar Filtered  
197 Network Construction [34], where significant gene correlation pairs are retained as an edge based on  
198 FDR < 0.05. For WGCNA, we selected a relatively stringent edge cutoff ( $|\text{correlation}| > 0.8$ ).  
199 Topological properties of the co-expressed network modules were used to identify important  
200 functional features of lncRNAs. Nodes with a high number (high degree) of connections, called hubs,  
201 have increased likelihood of being essential [42, 43]. We also considered a second topological feature  
202 of networks, termed 'bottlenecks' or betweenness centrality (i.e., a measure of the number of  
203 shortest paths passing through a node), which are critical in protein networks with functional and  
204 dynamic properties control most of the information flow in a network [44]. We defined hubs as the  
205 top 10% of nodes ranked by degree, and bottlenecks as the top 10% of the nodes ranked by  
206 betweenness centrality. Cytohubba [45], a Cytoscape plugin, was used to score and rank the nodes by  
207 network features and to characterize hubs and bottlenecks for modules with functional enrichment.

208 **Causal Inference Network** – Causal inference methodology, such as Parallel IDA, outperforms  
209 methods such as statistical correlation or regression [46] and can be used to construct a lncRNA–  
210 mRNA causal network [47]. We implemented parallel IDA to infer the causal effects of xeno-lncs on  
211 target PCGs in each biological module. Parallel IDA uses intervention calculus when the directed  
212 acyclic graph is absent [48] and was used to estimate lncRNA–PCG causal relationships for co-  
213 expression modules of interest. Parallel IDA estimates the causal structure from expression data using  
214 the parallel-PC algorithm (step 1) [49, 50]; estimates of causal effects of lncRNAs on PCGs are then  
215 obtained by applying do-calculus (step 2) [51]. Step 1: We used a parallel PC algorithm and  
216 observational data (expression profiles) for the rat xeno-lncs (1,447) and xenobiotic-responsive PCGs  
217 (2,637) to learn the causal structure, which is a completed partially directed acyclic graph (CPDAG).  
218 The analysis starts with a fully connected undirected graph and then determines if an edge is to be  
219 removed from or retained in the graph by conducting conditional independence tests for the two  
220 nodes connected by the edge. We used partial correlations for the conditional independence test

221 [52]. The algorithm then orients the CPDAG, which consist of directed and undirected edges, resulting  
222 in the equivalence class of directed acyclic graphs. The pcalg package in R was used to estimate  
223 CPDAG with a significance level ( $\alpha = 0.01$ ) for the CI test conducted by ParallelPC algorithm. Step 2:  
224 The causal effect of a lncRNA on a PCG was estimated by applying do-calculus, which when given a  
225 directed acyclic graph, estimates the causal effect of one node on any other node using observational  
226 data. Since multiple directed acyclic graphs (described above) resulted from CPDAG, we estimated  
227 causal effects for each one and used the lower bound of all possible causal effect absolute values as  
228 the final output. To construct lncRNA-PCG regulatory networks (see **Data Availability**), we used a  
229 cutoff of 0.5 for the absolute values of the causal effects to retain edges that show strong causation  
230 (**Table S8**).

231 **Data availability** – Full details for all co-expression networks and causal networks are available for  
232 visualization and query on the Network Data Exchange (NdeX) platform [53] and can be access  
233 through this link: [Co-expression and Causal Networks](#).

## 234 **Results**

235 **Liver xeno-lnc discovery** - We reconstructed the transcriptome for xenobiotic-exposed rat liver based  
236 on 115 RNA-seq datasets from male Sprague-Dawley rats given one of 27 chemicals representing  
237 seven distinct MOAs (**Table S1**). We used two complementary approaches (see **Methods**) to discover  
238 a total of 5,795 liver-expressed lncRNA genes, of which 37% are multi-exonic genes (**Table S2**). 1,447  
239 of the lncRNAs showed significant differential expression ( $|FC| > 4$  at  $FDR < 0.05$ ) following exposure  
240 to one or more of the 27 chemicals, and were designated xeno-lncs (**Table S3A**). We also identified  
241 2,637 PCGs responsive to these exposures (**Table S3B**).

242 **Xenobiotics grouped by MOA** - We implemented hierarchical clustering of the sets of xeno-lncs and  
243 xenobiotic-responsive PCGs to elucidate gene regulatory mechanisms across the 27 chemicals. Each  
244 chemical was assigned to one of seven MOAs [6, 15] (**Scheme 1**), each represented by at least three  
245 chemicals (**Table S1**): activation of the nuclear receptors CAR and/or PXR (pregnane X receptor),  
246 considered together because of their overlapping target gene specificities [11, 54]; activation of PPAR  
247 (PPAR $\alpha$  or PPAR $\gamma$ ); activation of ER; activation of AhR; inhibition of HMG-CoA reductase (HMG-CoAR);  
248 non-receptor based cytotoxicity; and non-receptor-based DNA damage. Chemicals linked to PPAR, ER,  
249 and HMG-CoAR clustered tightly within their respective MOAs, whereas chemicals linked to CAR/PXR,  
250 AhR and the non-receptor based MOAs formed incohesive clusters (**Figures 2A, 2B**). Thus, the six  
251 CAR/PXR activators were separated into three separate clusters, as were the three DNA damage  
252 agents, and the AhR agonist leflunomide induced gene expression changes distinct from those  
253 induced by the two other AhR activators for both lncRNAs and PCGs. This likely reflects the diversity  
254 of mechanisms through which some of these chemicals act, e.g., leflunomide can also activate MAP  
255 kinases and induce endoplasmic reticulum stress [55]. We found 66 PCGs and 32 xeno-lncs that  
256 responded significantly to at least two of the three AhR agonists (**Table S3C**). Two of the AhR  
257 agonists,  $\beta$ -naphthoflavone and 3-methylcholanthrene, often showed responses opposite to those of  
258 chemicals with other MOAs, most notably PPAR activators (**Figure 2C**). Aflatoxin B1, a potent  
259 hepatotoxin and hepatocarcinogen, also has AhR agonist activity [56] and clustered more closely with  
260 those two AhR activating chemicals than did leflunomide.

261 **Common xeno-lncs targets across multiple mode of actions** - Many xeno-lncs were dysregulated by  
262 chemicals representing multiple MOAs. 123 xeno-lncs responded to at least 10 of the 27 chemicals  
263 tested (**Figure 2D**). Furthermore, five xeno-lncs (rInc4657, rInc3088, rInc715, rInc1425, rInc, and

264 rlnC2750) were consistently down-regulated by at least 20 of the 27 chemicals (**Figure S2A**); 13 PCGs  
265 were also dysregulated across  $\geq 20$  exposures (**Figure 2E, Table S9**). Again, gene responses to the two  
266 specific AhR agonists were similar to responses induced by aflatoxin B1 but not leflunomide. Xeno-  
267 lncs and PCGs whose expression is dysregulated by multiple chemical exposures with distinct MOAs  
268 may be associated with general responses, such as liver injury or tissue repair stimulated by  
269 xenobiotic exposure. Two of the 13 PCGs, *Sult2a2* (**Figure S2B**) and *Ugt1a2*, metabolize xenobiotics  
270 and were consistently up-regulated, while 3 other PCGs, *Ltc4s* (**Figure S2B**), *Stac3*, *Car1*, were down-  
271 regulated by all but one of the 20 chemicals. The other 8 multi-xenobiotic-responsive PCGs (*Acot1*  
272 (**Figure S2B**), *Agpat9*, *Slc16a5*, *Colq*, *Cyp2c24*, *Akr1b7*, *Cyp2b1*, *Rsp9*) showed distinct responses to  
273 chemicals with different MOAs. Genes involved in fatty acid metabolism (*Acot1*) [57], lipid  
274 biosynthesis (*Agpat9*) [58], transport (*Slc16a5*), and other non-metabolic functions (*Colq*) were  
275 induced by most chemicals, but were repressed by the AhR agonists, including aflatoxin-B1. *Cyp2c24*,  
276 a rat P450, was up-regulated by chemicals with various MOAs, but showed inconsistent responses to  
277 PPAR activators (**Figure 2E**). *Akr1b7*, which detoxifies lipid peroxidation by-products [59], was induced  
278 by CAR/PXR agonists but was down-regulated by 5 of 6 PPAR activators and by four chemicals with  
279 other MOAs. *Cyp2b1* was up-regulated by nearly all activators of CAR/PXR and PPAR but was  
280 repressed by AhR agonists.

281 **Toxicological marker genes** - We used two criteria to identify lncRNAs and PCGs that are MOA-  
282 selective markers of xenobiotic exposure: 1) the gene shows a common, robust response ( $|FC| > 4$  and  
283  $FDR < 0.05$ ) to all three chemicals with the same MOA, in the case of ER, HMG-CoAR, and AhR, or to a  
284 majority ( $\geq 4$ ) of the 6 chemicals for each of the other MOAs: CAR/PXR, PPAR, and cytotoxicity/DNA  
285 damage; and 2) the gene responds in the same direction (at a threshold of  $|FC| \geq 3$  and  $FDR < 0.05$ ) to  
286 no more than 2 chemicals assigned to other MOAs, provided that the two outlier chemicals do not  
287 both act via the same MOA. We identified 162 such MOA-selective markers (81 PCGs, 81 xeno-lncs)  
288 (**Table S10**). Examples are shown for each MOA in **Figure S3**. *Ces2a* is a top marker for CAR/PXR  
289 activation, consistent with [60], while *Acox1* is a strong marker for PPAR activators, all showing  $> 30$ -  
290 fold induction, consistent with findings in mouse and human models [61]. Further, two xeno-lncs  
291 were markers for both CAR/PXR and PPAR. *Aldh3a1* was a marker AhR responses, consistent with its  
292 strong induction by hepatotoxic dioxin-like compounds [62]. Finally, *Mapk15* was strongly induced by  
293 all three chemicals that target HMG-CoAR, *Myom2* was a marker for ER agonists, and *CD300lb* was a  
294 marker for chemicals that induce cytotoxicity or DNA damage. These marker genes may be  
295 incorporated into toxicological signatures to characterize MOAs of novel xenobiotic exposures.

296 **Identifying functional xeno-lncs by evolutionary analysis** - Ortholog discovery and comparative  
297 studies across species are widely used for functional annotation of evolutionarily conserved PCGs.  
298 However, lncRNAs evolve rapidly, and many are not broadly conserved [63]. lncRNAs are, however,  
299 often found in syntenic positions in the genome and share short conserved domains [64]. Here, we  
300 used a combination of sequence identity and synteny between species to identify orthologs of the rat  
301 xeno-lncs and then infer biological functions. Of 5,795 liver-expressed rat lncRNAs, 3,020 (52%)  
302 shared orthology with either mouse or human lncRNAs, including 774 (53%) of the 1,447 rat xeno-  
303 lncs (**Figure 3A**). Some of these orthologs are well-characterized functional lncRNAs. For instance, rat  
304 xeno-lnc rlnC449, which is induced by HMG-CoAR inhibitors and cytotoxicity and DNA damage agents  
305 but is repressed by several activators of CAR/PXR, PPAR and ER, showed 64% sequence identity with  
306 human lncRNA H19, both at the transcript level (TTI) and at the genome level (TGI) (**Figure 3B**).  
307 lncRNA H19 is important for fetal liver development and is repressed after birth, but is over-  
308 expressed in multiple human cancers, including hepatocellular carcinoma, where it enhances tumor  
309 progression [65, 66]. Another rat liver xeno-lnc, rlnC397, which is induced by several nuclear

310 receptors agonists and by the hepatotoxin carbon tetrachloride, shares 66% TTI with mouse lncRNA  
311 Snhg14 (**Figure 3C**). Snhg14 is overexpressed in several cancers and potentiates tumor progression, in  
312 humans, by serving as a sponge (endogenous competitor RNA) for multiple microRNAs [67-69]. **Table**  
313 **S4** presents the full set of rat lncRNA orthologs and their inferred functions.

314 **Rat-Mouse ortholog responses to CAR/PXR activators** - We identified 140 rat xeno-lncs with mouse  
315 orthologs that responded to at least one CAR/PXR activator in both mouse and rat liver. Two-way  
316 hierarchical clustering of expression data across exposures indicates species is a dominant separation  
317 factor (**Figure S4A**). Some lncRNAs showed a consistent pattern of dysregulation in both species  
318 (rlnC4048–mlnc4655, both up (**Figure S4B**); and rlnC4100–mlnc4577, both down (**Figure S4C**)), while  
319 others showed opposite regulation (rlnC2209–mlnc3859; **Figure S4D**). Some xeno-lncs were  
320 responsive to CAR activators after multiple days of exposure, e.g., rlnC1448–mlnc2065, which  
321 responded to CAR activators significantly ( $|FC| > 2$ , FDR  $< 0.05$ ) in both species after a 4-5-day  
322 exposure, but not after 1 day in mouse liver (**Figure S4E, Table S5C**). Thus, xeno-lncs perturbed by  
323 chemicals with the same MOA can exhibit different responses, depending on species and duration of  
324 exposure.

325 **Functional prediction of lncRNA–PCG relationships using gene co-expression networks** - Functional  
326 lncRNAs have been identified using cell-based screens, e.g., for effects on cell growth, however, that  
327 approach is not readily implemented in an intact liver model. Here, in an alternative approach, we  
328 clustered the 1,447 rat xeno-lncs together with the 2,637 xenobiotic-responsive rat PCGs based on  
329 their expression profiles across the 27 chemical exposures. This allowed us to infer rat xeno-lnc  
330 functions from the known functions of PCGs in the same co-expression cluster (guilt-by-association)  
331 [70, 71]. We constructed co-expression networks using two complementary methods: WGCNA, which  
332 uses agglomerative (bottom-up) clustering, resulting in large gene modules [31]; and MEGENA, which  
333 uses divisive (top-down) clustering to discover smaller, coherent network modules and sub-modules  
334 [34]. We identified eight co-expression modules (gene networks) using WGCNA and 89 using  
335 MEGENA (**Table S6A, S6B**). For each co-expression network, we identified rat lncRNAs whose  
336 orthologs have functional annotations, including oncogenic gene drivers and tumor suppressors. We  
337 also computed module functional enrichments to obtain a primary level of annotation for lncRNA  
338 function. These lncRNA–PCG networks helped us identify many highly connected lncRNAs in each  
339 module, including intra-modular hubs and bottleneck genes, which are at critical nodes controlling  
340 communication among other nodes in the network, as indicated by a high number of non-redundant  
341 shortest paths through the specific node or edge [44]. We discovered co-expressed modules with  
342 striking functional enrichments for genes in multiple biological processes and pathways, including  
343 fatty acid metabolism (MEGENA module C9), lipid and sterol metabolism (module Black), cell cycle  
344 (module C13) and immune response (module C7) (**Table S11, Table S12**). One module, C10 (68 PCGs,  
345 91 xeno-lncs), did not show any significant biological or pathway enrichment, but contains all 50 ER  
346 marker genes. The eleven xeno-lncs identified as hub or bottleneck genes in this module are  
347 suggested to play a regulatory role in estrogen-based pathways (**Figure S5, Table S12A**). Highlights of  
348 select gene modules are presented below.

349 **Xeno-lnc hub and bottleneck genes regulating fatty acid metabolism and PPAR signaling** - Module  
350 C9 (258 PCGs, 152 xeno-lncs) was strongly enriched for genes involved in fatty acid metabolism  
351 (N=114 genes, Enrichment Score (ES) =18.5, **Table S11E**). This module is also strongly enriched for  
352 peroxisomal genes (ES=13.0) and harbors 35 of the 39 (90%) PPAR marker genes. Seven xeno-lncs  
353 were either top intra-modular hubs, bottlenecks, or both (**Figure 4, Figure S6, Table S12B**), which  
354 indicates they have important regulatory roles and their xenobiotic responsiveness may contribute to



355 dysregulation of hepatic fatty acid metabolism following chemical exposure [72]. One of these  
356 lncRNAs, rlnC973, is orthologous with human lncRNA AS-RBM1, which enhances RBM1 protein  
357 translation and up-regulates megakaryocyte differentiation and leukemogenesis [73]. 35 xenobiotic-  
358 responsive PCGs in this module are also critical hub or bottleneck genes involved in fatty acid  
359 metabolism (Table S12B), and five of these genes (*Cyp2j4*, *Acat1*, *Acaa1a*, *Ucp3*, *Acox1*) are PPAR  
360 MOA-selective marker genes (Table S10).

361 **Xeno-lnc associated with cell cycle regulatory genes** - Module C13, comprised of 106 PCGs and 6  
362 xeno-lncs, includes 87 PCGs (82%) involved in cell cycle pathways (Figure 5A, Table S12C). The strong  
363 enrichment of this module for cell cycle and cell division genes (ES= 17.7) and for microtubule  
364 binding, spindle, kinesin and related terms (ES=7.6) (Table S11H) implicates the six lncRNAs in this  
365 module in these processes. One, xeno-lnc rlnC3347, is orthologous with NORAD, a human lncRNA that  
366 is up-regulated by DNA damage, maintains chromosomal stability in human cells, and is implicated in  
367 tumorigenesis [74, 75]. 33 of the 87 cell cycle regulatory genes in module C13 are oncogenic drivers  
368 and two are tumor suppressors (Table S13). Five of the six xeno-lncs may be oncogenic (onco-lncs), as  
369 they show significant positive correlation with cancer drivers in the subnetwork, albeit weakly (Figure  
370 S7). Down regulation of the oncogenic drivers and the onco-lncs in module C13 was commonly seen  
371 after exposure to chemicals associated with HMG-CoAR, ER, AhR, PPAR and CAR/PXR (Figure 5B). One  
372 exception was rlnC3587, which was significantly up-regulated by 10 of the chemical exposures (Figure  
373 5B, red arrow). All 35 oncogenic drivers and tumor suppressors were strongly induced by the  
374 hepatocarcinogen N-nitrosodimethylamine ( $\log_2|FC| = 2-5$ ), and to a lesser extent by PPAR activators  
375 and CAR/PXR-activating chemicals. The finding of multi-xenobiotic responsive xeno-lncs in this  
376 module highlights the potential cell cycle disruptive actions of the associated xenobiotics.

377 **Immune based responses of xeno-lncs:** Module C7 (480 PCGs, 94 xeno-lncs) was highly enriched  
378 (ES=14.2) for immune response and related terms (chemokine, cytokine and MHC processing) (Table  
379 S11D, Table S12D). This module includes 94 xeno-lncs, of which three are hub genes (rlnC2830,  
380 rlnC1130, rlnC1023). rlnC2830 was positively co-expressed with nine PCGs involved in immune  
381 response (Figure 6A). These include factors active in lymphocyte signaling and antigen uptake (Hcls1)  
382 [76], regulatory T cell-mediated suppression of CD4+ effector T cells (Ncf1) [77], modulation of  
383 macrophage functions (Slamf8) [78], and T cell-dependent immunity (Hk3) [79]. N-  
384 nitrosodimethylamine, which activates lymphocytes to produce pro-inflammatory cytokines [80] that  
385 induce hepatic fibrosis and liver inflammation [81], induced rlnC2830 and all nine immune genes  
386 (Figure 6B, Table S14A). N-nitrosodimethylamine also up-regulated 112 (64%) of the 125 oncogenic  
387 driver or suppressor genes in module C7 (Table S14B). The hub gene rlnC1130 was connected to six  
388 genes in module C7, while hub-bottleneck rlnC1023 made connections with a partially overlapping  
389 set of nine genes (Figure 6C). rlnC1023 negatively correlated with Arg1, an immunosuppressive gene  
390 [82], and with Emp2, a tumor suppressor (Li et al. 2013). These two regulatory xeno-lncs were  
391 negatively correlated with Sox4, a heptacarcinogenic driver [83], and showed positive associations  
392 with Il6R and Mat1a. Miconazole, an antifungal agent and CAR/PXR agonist, significantly repressed  
393 both regulatory xeno-lncs and seven of the PCGs, while strongly inducing three others, including  
394 S100a6 (Figure 6D). Increased expression of S100a6 promotes cell proliferation in human HCC [84].  
395 Overall, 50 xeno-lncs from module C7 showed either positive or negative associations with 125  
396 oncogenic drivers or suppressors (Table S14B). Chemicals that dysregulate these xeno-lncs are  
397 expected to have a major impact on tumorigenesis.

398 **Regulatory xeno-lncs associated with sterol metabolism and viral response** - We used a parallel IDA  
399 algorithm to learn causal structures from expression data and construct lncRNA-PCG causal

400 regulatory networks for biologically interesting modules. Xeno-lncs that occupy critical nodes in co-  
401 expression modules (i.e., hubs or bottlenecks) often showed strong causal effects. For example,  
402 WGCNA module Black contained 145 nodes (103 PCGs, 42 xeno-lncs). Causal network analysis based  
403 on an absolute value of causal effect cutoff  $>0.5$  reduced the Black module to 90 nodes, including 25  
404 xeno-lncs showing strong causal effects on their predicted gene targets ( $N=65$ ). This module was  
405 enriched in sterol metabolism ( $ES=13.7$ , **Table S11K**; pink nodes in **Figure 7**) and encompassed 36 of  
406 63 (57%) HMG-CoAR marker genes (black node border color, **Figure 7**; **Table S12E**). A small isolated  
407 sub-network was related to viral response ( $ES=4.1$ ; green nodes), with *rlnc4746* acting as the causal  
408 center. Two regulatory xeno-lncs in the causal network (*rlnc2973*, *rlnc322*) have functional orthologs  
409 positively associated with tumorigenesis: *Lnc-SC5DL-3:1* (ortholog of *rlnc2973*) is up-regulated in  
410 triple negative breast cancer [85]; and elevated expression of *lncRNA RP11-21L23.2* (ortholog of  
411 *rlnc322*), is associated with high risk in non-small cell lung cancer [86]. Both xeno-lncs were strongly  
412 induced ( $\log_2$  FC = 4–6) by all three HMG-CoAR inhibitors (**Table S3A**).

413 **Xeno-lncs repressed by multiple xenobiotics may be hepatoprotective or hepatocarcinogenic –**  
414 Module C14 includes four of the five xeno-lncs consistently down-regulated by  $\geq 20$  xenobiotics  
415 (*rlnc1425*, *rlnc715*, *rlnc2750*, *rlnc3088*) (**Figure 8A-C**). Expression of these xeno-lncs correlates  
416 positively with several oncogenic drivers that are also widely down-regulated following xenobiotic  
417 exposure. The down-regulation of these xeno-lncs is thus a hepatoprotective response. For example,  
418 expression of *rlnc1425*, a module C14 hub gene that was down-regulated by 22 xenobiotics, showed  
419 positive correlations with oncogenic drivers *Ptk6* and *Ppard*, both associated with hepatotoxicity [87-  
420 89] (**Figure 8A**). However, *rlnc1425* also showed casual, negative correlation with metallothioneins  
421 *Mt1a* and *Mt2a*, which protect mice from hepatocarcinogen-induced liver damage and carcinogenesis  
422 [90] and are induced in rat liver, up to 16-fold, by the three ER agonists and by leflunomide (AhR) and  
423 econazole (CAR/PXR) (**Table S15A**). Expression of *rlnc715*, which was down-regulated by 21  
424 chemicals, showed positive causal associations with cancer driver *Ptk6* (X. Chen et al. 2016), and  
425 tumor suppressor gene *Npas2*; its impact on hepatoprotection vs. hepatotoxicity is thus uncertain  
426 (**Figure 8A**, **Table S15B**).

427 Expression of *rlnc2750*, which was down-regulated by 21 chemicals, was positively associated with  
428 the tumor suppressors *Igfals* [91] and *Bmf* [92] (**Figure 8B**), which were also down-regulated by  
429 multiple chemicals (**Table S15C**). Down-regulation of *Igfals* enhances IGF signaling and thereby  
430 promotes hepatocarcinogenesis [93], while down-regulation of *Bmf* is associated with hepatocellular  
431 carcinoma progression [94]. *rlnc2750* had negative causal association with the pro-apoptotic gene  
432 *Hrk*, which was up-regulated by 11 xenobiotics and activates apoptosis under stress [95]. *rlnc3088*  
433 was down-regulated by multiple chemicals, as were its causally associated target genes. These  
434 include the oncogenic driver *Socs2* and the hub gene *Nrep* (P311) (**Figure 8C**), which plays a key role  
435 in reactive oxygen species-mediated hepatic stellate cell migration during liver fibrosis [96]. *rlnc3088*  
436 had negative causal effects on *Pla2g12a*, a phospholipase A2, which was induced by 15 of the 27  
437 chemicals, including the AhR agonist leflunomide (**Table S15D**).

438 The fifth lncRNA consistently down-regulated by  $\geq 20$  chemicals, *rlnc4657*, is in module C12, where it  
439 forms positive causal associations with three PCGs down-regulated by multiple chemicals (*Apoc3*,  
440 *St8sia1*, *Gimd1*) (**Figure 8D**, **Table S15E**). *Apoc3* contributes to cardiovascular disease risk by  
441 increasing plasma triglycerides via lipolysis of triglyceride-rich lipoproteins [97], and its repression by  
442 PPAR activators is therapeutically beneficial. *Gimd1*, whose function is unknown, also showed strong,  
443 consistent repression by PPAR activators ( $\log_2$  FC = -5 to -7) (**Table S3B**). Beneficial effects of *rlnc4657*  
444 down-regulation by diverse chemicals are also apparent from the causally associated down-

445 regulation of St8sia1, a ganglioside D3 synthase that promotes growth and metastasis in triple  
446 negative breast cancer [98]. St8sia1 was repressed by chemicals with various MOAs, including all  
447 three ER agonists, consistent with its repression by estradiol in human breast cancer cells [99]. The  
448 down-regulation of rlnC4657 by many xenobiotics may also have deleterious health effects. Thus,  
449 rlnC4657 showed negative causal association with two PCGs induced by multiple chemicals, one of  
450 which, Cidea, controls lipid storage, lipolysis and lipid secretion [100] and promotes hepatic steatosis  
451 when up-regulated in mouse liver [101]. The second gene, Zmynd12, is a zinc finger protein of  
452 unknown function. Finally, rlnC4657 was co-expressed with Arntl2 (Bmal2), which was repressed by  
453 14 xenobiotics (Figure 8D). Arntl2 is an anti-apoptotic factor that is down-regulated in hepatocellular  
454 carcinoma, where its suppression enhances cell growth [102]. Thus, its repression by xenobiotics may  
455 contribute to hepatocarcinogenesis.

456 **Functional xeno-lnc candidates and predicted *cis* vs *trans* interactions with PCG targets** – We  
457 identified 67 top candidates for functional xeno-lncs (Table S16A) by integrating multiple datasets  
458 and criteria, including: their roles as causal regulators, or as hubs or bottlenecks in a functional  
459 module; shared orthology with well-characterized human or mouse lncRNAs; and xeno-  
460 responsiveness to multiple chemicals, or as a MOA-selective marker. Co-expression data and causal  
461 interactions between these 67 xeno-lncs and their putative PCG targets, combined with chromosomal  
462 location information, was used to predict whether each xeno-lnc regulates its targets in a *cis* or *trans*  
463 manner. Putative *cis* interactions were indicated for lncRNA–PCG pairs falling within a distance of 250  
464 kb (Table S16B). *trans* interactions are shown Table S16C. The *cis* and *trans* PCG target lists were  
465 subdivided into activator and inhibitor effects, based on whether the xeno-lnc–PCG expression  
466 correlation was positive or negative. These analyses provide a basis for hypothesis-driven  
467 experimental studies on the functional roles of individual xeno-lncs and their downstream causal  
468 implications for responses to xenobiotic exposure.

## 469 Discussion

470 lncRNAs regulate a wide range of cellular processes, including chromatin states, transcriptional  
471 output, mRNA stability and protein function [103]. However, the extent to which lncRNAs impact the  
472 toxicogenomic landscape is poorly understood. Little is known about their responses to xenobiotic  
473 exposure, and systematic approaches to deduce their regulatory roles in toxicological responses to  
474 foreign compounds have not been developed. Here we address these issues by introducing an  
475 integrated computational framework that utilizes transcriptomic data for discovery of global effects  
476 of xenobiotic exposure on pathways and mechanisms associated with dysregulation of lncRNA  
477 expression (Figure 1). We applied this framework to a rich toxicogenomic dataset comprised of 115  
478 RNA-seq datasets representing 27 chemical exposures in a rat model [6] to assemble the toxico-  
479 transcriptome of liver, a key tissue for xenobiotic metabolism and toxification/detoxification. We  
480 discovered gene and isoform structures for almost 6,000 liver-expressed rat lncRNAs, a majority of  
481 which are novel genes, and established expression patterns for more than 1,400 xenobiotic-  
482 responsive lncRNAs (xeno-lncs), many with human and/or mouse orthologs. Further, we used two  
483 powerful data-driven approaches for co-expression analysis, WGCNA [31] and MEGENA [34], to  
484 discover xenobiotic-responsive gene modules enriched in various cellular processes, including fatty  
485 acid and sterol metabolism, cell cycle and immune response. Xeno-lncs occupying key positions as  
486 hubs or bottleneck genes were identified in the derived networks, and causal inference was used to  
487 identify xeno-lncs that causally influence expression of their target genes, i.e., are causal regulators of  
488 the biological network. Thus, we present a comprehensive toxicogenomic analysis of the effects of

489 foreign chemicals on the non-coding transcriptome, and we elucidate xenobiotic-responsive  
490 regulatory lncRNAs for key biological pathways commonly perturbed in xenobiotic-exposed liver.

491 We used two complementary approaches for lncRNA discovery [9, 22] to increase the likelihood of  
492 discovering novel liver-expressed lncRNAs. 1,447 of the 5,795 rat liver-expressed lncRNAs identified  
493 were characterized as xeno-lncs based on their responsiveness to one or more xenobiotic exposures.  
494 We applied a relatively stringent threshold (>4-fold increase or decrease in expression at FDR <0.05)  
495 to reduce false positives resulting from transcriptional noise from lncRNAs expressed at a low level.  
496 The set of 1,447 xeno-lncs discovered here is defined by the transcriptional responses stimulated by  
497 the 27 chemical exposures included in our analyses, and should thus be viewed as a minimal xeno-lnc  
498 gene set. Additional xeno-lncs are very likely to be discovered and their gene structures and isoform  
499 models further refined once expression data for additional xenobiotic exposure datasets become  
500 available and can be integrated into the liver toxico-transcriptome presented here.

501 We found 81 xeno-lncs and 81 xenobiotic-responsive PCGs that were primarily associated with  
502 chemicals linked to a single MOA (xenobiotic MOA-selective marker genes; **Table S10**). We also  
503 found, however, that many xeno-lncs responded in common to multiple xenobiotics encompassing  
504 multiple MOAs. For example, 123 xeno-lncs each responded to at least 10 different chemicals (**Figure**  
505 **2D**), i.e., they respond via at least two different MOAs. While some of these xeno-lncs respond to  
506 chemicals that activate mechanistically related MOAs with overlapping target gene specificities (e.g.,  
507 the nuclear receptors CAR/PXR and PPARA) [104, 105], many individual xeno-lncs respond to multiple  
508 chemicals that act via diverse MOAs. Such xeno-lnc responses are likely to encompass more general  
509 cellular and tissue responses to xenobiotic exposure, such as liver injury and liver repair, or the  
510 activation of hepatoprotective pathways and mechanisms. For example, four of the five xeno-lncs  
511 repressed by at least 20 of the 27 exposures, and encompassing all 7 MOAs, were positively co-  
512 expressed with several oncogenic drivers but showed either positive or negative associations with  
513 several tumor suppressors (**Figure 8**). Similar patterns of response to diverse xenobiotics were seen  
514 with some PCGs. Two PCGs active in xenobiotic detoxification, *Sult2a2* and *Ugt1a2*, were up-  
515 regulated by  $\geq 20$  xenobiotics, while 22 of the 27 chemicals examined (including all MOAs except for  
516 DNA damage agents), strongly down-regulated carbonic anhydrase I (*Car1*), which like carbonic  
517 anhydrases III and VII, may protect liver from oxidative stress [106]. Leukotriene C4 synthase (*Ltc4s*)  
518 was also strongly repressed by 22 of the 27 chemicals tested. *Ltc4s* catalyzes biosynthesis of  
519 leukotriene C4, a potent inflammatory mediator [107], and its down-regulation protects from hepatic  
520 ischemia reperfusion injury [108]. Thus, xenobiotics that work through different MOAs can  
521 dysregulate common sets of lncRNAs and PCGs involved in xenobiotic detoxification and  
522 hepatoprotection.

523 Agonists of AhR, and the hepatotoxic chemical aflatoxin B1, which also has AhR agonist activity [56],  
524 often showed effects that were opposite of chemicals that act via other MOAs, most notably for  
525 chemicals that activate PPAR (**Figure 2C**). For example, the xenobiotic-metabolizing P450 enzyme  
526 *Cyp2b1* was induced by 5 of 6 PPAR agonists (**Table S3C**) but was repressed by all three AhR agonists,  
527 while *Acot1*, a PPAR target and a key player in rodent liver tumorigenesis [109], was up-regulated by  
528 22 chemicals but not by the AhR agonists or by aflatoxin-B1. Similarly, we found five xeno-lncs that  
529 were each down-regulated by at least 20 of the 27 chemicals examined, but did not respond to the  
530 AhR agonists  $\beta$ -naphthoflavone and 3-methylcholanthrene. Mechanistic studies will be required to  
531 elucidate the mechanism for these disparate responses to activation of AhR vs. other MOAs.

532 In some cases, xeno-lnc orthologs showed significant species-specific responses to chemical  
533 exposures. Thus, many of the 140 orthologous pairs of rat and mouse lncRNAs that responded to  
534 CAR/PXR activators showed species-specific responses. This finding parallels the species difference in  
535 xenobiotic responses sometimes seen for orthologous PCGs (**Figure S4**), which may reflect factors  
536 such as species differences in the specificity of xenobiotic receptors for agonists and/or their target  
537 genes [30, 110-112]. This potential for species-dependent responses must be considered when  
538 evaluating lncRNA orthologs and their biological activities.

539 We built gene co-expression networks (gene modules) based on gene co-expression patterns for  
540 xeno-lncs and xenobiotic-responsive PCGs across the 27 xenobiotic exposures, and then used the  
541 associations between xeno-lncs and PCGs within the networks to infer the functions of liver-  
542 expressed xeno-lncs (guilt-by-association). Networks were reconstructed using WGCNA, which is  
543 widely used [10, 113-115], and using a complementary approach, MEGENA, which has identified  
544 mutational drivers in non-alcoholic fatty liver disease [116, 117]. Many of the gene modules we  
545 discovered were enriched in specific biological functions, including fatty acid metabolism, cell  
546 division, and immune response pathways. In some cases, MOA marker genes were grouped in a  
547 common module based on their coordinated co-regulation pattern (e.g., ER marker genes in module  
548 C10; **Figure S5**). We also implemented network modeling to identify hub or bottleneck genes that  
549 may regulate the overall network. Established cell cycle regulators (Bub1b, Prc1, Cdk1) occupied key  
550 positions in the cell division enriched module (**Figure 5**), and known regulators of fatty acid and lipid  
551 metabolism (Hadhb [118], Elovl6, Acot2, Acot1 [119], Pklr [116]) were top hubs in the network  
552 module enriched for this metabolic pathway (**Figure 4**). This validation of our approach lends support  
553 for the roles we propose for key xeno-lncs identified as hubs or bottlenecks in these biological  
554 processes and pathways. Key findings include the discovery of novel regulatory xeno-lncs that were  
555 co-expressed with tumor suppressors or cancer drivers in the immune response module C7 (**Figure**  
556 **S8**) or that occupied critical positions in networks enriched for fatty acid metabolism (**Figure 4**), viral  
557 response and sterol metabolism (**Figure 7**). In many cases, our findings were strengthened by using  
558 Parallel IDA, a causal inference algorithm [120-122], which can help distinguish true, causal regulatory  
559 relationships from simple correlative associations, as summarized in **Table S16A**.

560 Ortholog analysis, based on either sequence conservation or synteny [123], can facilitate discovery of  
561 biologically relevant properties of lncRNAs [124]. We used this approach to identify rat xeno-lncs  
562 showing conservation with known oncogenic lncRNAs, including H19 (rInc449), LINC00665 (rInc5324)  
563 [125], SNHG20 (rInc 3767) [126], and Cytos (rInc1439) [127] (**Table S4**). Chemicals that dysregulate  
564 these xeno-lncs can be expected to have a major impact on tumorigenesis. For example,  
565 rInc1439/Cytos, whose up-regulation correlates with hepatocellular carcinoma progression and poor  
566 patient prognosis [127], was strongly induced by the CAR/PXR activators miconazole and  
567 methimazole and by chemicals that induce DNA damage (ifosfamide and N-nitrosodimethylamine)  
568 (**Table S14B**). Supporting this finding, the module C7 co-expression network containing rInc1439  
569 (**Figure S8B**) shows positive correlation between rInc1439 and S100a11, which is overexpressed in  
570 many human cancers [128], and also with Sox4, which promotes hepatocarcinogenesis by inhibiting  
571 p53-mediated apoptosis [83].

572 In conclusion, we present a novel approach to discover xenobiotic-responsive lncRNAs and obtain  
573 important insights into their roles in diverse cellular processes, the biological pathways they impact  
574 and their effects on hepatic responses to xenobiotic exposures. The computational framework that  
575 we propose (**Figure 1**) can help prioritize lncRNA targets for further computational and experimental  
576 analysis, including toxicological risk assessment. These approaches are expected to advance the goals

577 of computational toxicology, which requires new integrative approaches to measure, model and  
578 evaluate the toxicological consequences of xenobiotic exposure, including hazard potential and  
579 health risk assessment [129]. Future studies can apply this framework to discover regulatory lncRNAs  
580 in other contexts, including single cell analysis, which may be used to further characterize lncRNA  
581 responses and mechanisms of xenobiotic action across different cell types in liver, including zoned  
582 hepatocytes and endothelial cells [130], and may increase the reliability of co-expression and causal  
583 analysis by increasing the number of data points.

584 Acknowledgements - This work is supported in part by NIH grant ES 024421 (to DJW).

585

## 586 REFERENCES

- 587 [1] X. Gu, J.E. Manautou, Molecular mechanisms underlying chemical liver injury, *Expert reviews in molecular*  
588 *medicine*, 14 (2012) e4-e4.
- 589 [2] C.P. Wild, Complementing the Genome with an “Exposome”: The Outstanding Challenge of Environmental  
590 Exposure Measurement in Molecular Epidemiology, *Cancer Epidemiology Biomarkers & Prevention*, 14  
591 (2005) 1847-1850.
- 592 [3] T.K. Chang, D.J. Waxman, Synthetic drugs and natural products as modulators of constitutive androstane  
593 receptor (CAR) and pregnane X receptor (PXR), *Drug Metab Rev*, 38 (2006) 51-73.
- 594 [4] K. Howe, F. Sanat, A.E. Thumser, T. Coleman, N. Plant, The statin class of HMG-CoA reductase inhibitors  
595 demonstrate differential activation of the nuclear receptors PXR, CAR and FXR, as well as their downstream  
596 target genes, *Xenobiotica; the fate of foreign compounds in biological systems*, 41 (2011) 519-529.
- 597 [5] K. Kobayashi, Y. Yamanaka, N. Iwazaki, I. Nakajo, M. Hosokawa, M. Negishi, K. Chiba, Identification of HMG-  
598 CoA reductase inhibitors as activators for human, mouse and rat constitutive androstane receptor, *Drug*  
599 *metabolism and disposition: the biological fate of chemicals*, 33 (2005) 924-929.
- 600 [6] C. Wang, B. Gong, P.R. Bushel, J. Thierry-Mieg, D. Thierry-Mieg, J. Xu, H. Fang, H. Hong, J. Shen, Z. Su, J.  
601 Meehan, X. Li, L. Yang, H. Li, P.P. Łabaj, D.P. Kreil, D. Megherbi, S. Gaj, F. Caiment, J. van Delft, J. Kleinjans, A.  
602 Scherer, V. Devanarayan, J. Wang, Y. Yang, H.-R. Qian, L.J. Lancashire, M. Bessarabova, Y. Nikolsky, C.  
603 Furlanello, M. Chierici, D. Albanese, G. Jurman, S. Riccadonna, M. Filosi, R. Visintainer, K.K. Zhang, J. Li, J.-H.  
604 Hsieh, D.L. Svoboda, J.C. Fuscoe, Y. Deng, L. Shi, R.S. Paules, S.S. Auerbach, W. Tong, The concordance between  
605 RNA-seq and microarray data depends on chemical treatment and transcript abundance, *Nature*  
606 *Biotechnology*, 32 (2014) 926.
- 607 [7] A. Frankish, M. Diekhans, A.-M. Ferreira, R. Johnson, I. Jungreis, J. Loveland, J.M. Mudge, C. Sisu, J. Wright,  
608 J. Armstrong, GENCODE reference annotation for the human and mouse genomes, *Nucleic acids research*, 47  
609 (2018) D766-D773.
- 610 [8] J.L. Rinn, H.Y. Chang, Genome regulation by long noncoding RNAs, *Annu Rev Biochem*, 81 (2012) 145-166.
- 611 [9] T. Melia, P. Hao, F. Yilmaz, D.J. Waxman, Hepatic Long Intergenic Noncoding RNAs: High Promoter  
612 Conservation and Dynamic, Sex-Dependent Transcriptional Regulation by Growth Hormone, *Molecular and*  
613 *cellular biology*, 36 (2016) 50-69.
- 614 [10] T. Melia, D.J. Waxman, Sex-Biased lncRNAs Inversely Correlate With Sex-Opposite Gene Coexpression  
615 Networks in Diversity Outbred Mouse Liver, *Endocrinology*, 160 (2019) 989-1007.

- 616 [11] N.J. Lodato, T. Melia, A. Rampersaud, D.J. Waxman, Sex-Differential Responses of Tumor Promotion-  
617 Associated Genes and Dysregulation of Novel Long Noncoding RNAs in Constitutive Androstane Receptor-  
618 Activated Mouse Liver, *Toxicol Sci*, 159 (2017) 25-41.
- 619 [12] A.C. Bester, J.D. Lee, A. Chavez, Y.R. Lee, D. Nachmani, S. Vora, J. Victor, M. Sauvageau, E. Monteleone, J.L.  
620 Rinn, P. Provero, G.M. Church, J.G. Clohessy, P.P. Pandolfi, An Integrated Genome-wide CRISPRa Approach to  
621 Functionalize lncRNAs in Drug Resistance, *Cell*, 173 (2018) 649-664 e620.
- 622 [13] S.J. Liu, M.A. Horlbeck, S.W. Cho, H.S. Birk, M. Malatesta, D. He, F.J. Attenello, J.E. Villalta, M.Y. Cho, Y.  
623 Chen, CRISPRi-based genome-scale identification of functional long noncoding RNA loci in human cells,  
624 *Science*, 355 (2017) eaah7111.
- 625 [14] S. Zhu, W. Li, J. Liu, C.H. Chen, Q. Liao, P. Xu, H. Xu, T. Xiao, Z. Cao, J. Peng, P. Yuan, M. Brown, X.S. Liu, W.  
626 Wei, Genome-scale deletion screening of human long non-coding RNAs using a paired-guide RNA CRISPR-Cas9  
627 library, *Nat Biotechnol*, 34 (2016) 1279-1286.
- 628 [15] K.M. Funderburk, S.S. Auerbach, P.R. Bushel, Crosstalk between Receptor and Non-receptor Mediated  
629 Chemical Modes of Action in Rat Livers Converges through a Dysregulated Gene Expression Network at Tumor  
630 Suppressor Tp53, *Frontiers in genetics*, 8 (2017) 157.
- 631 [16] C. Tyner, G.P. Barber, J. Casper, H. Clawson, M. Diekhans, C. Eisenhart, C.M. Fischer, D. Gibson, J.N.  
632 Gonzalez, L. Guruvadoo, The UCSC genome browser database: 2017 update, *Nucleic acids research*, 45 (2016)  
633 D626-D634.
- 634 [17] D. Kim, G. Pertea, C. Trapnell, H. Pimentel, R. Kelley, S.L. Salzberg, TopHat2: accurate alignment of  
635 transcriptomes in the presence of insertions, deletions and gene fusions, *Genome Biol*, 14 (2013) R36.
- 636 [18] C. Trapnell, A. Roberts, L. Goff, G. Pertea, D. Kim, D.R. Kelley, H. Pimentel, S.L. Salzberg, J.L. Rinn, L.  
637 Pachter, Differential gene and transcript expression analysis of RNA-seq experiments with TopHat and  
638 Cufflinks, *Nature protocols*, 7 (2012) 562.
- 639 [19] I.E. Schor, G. Bussotti, M. Maleš, M. Forneris, R.R. Viales, A.J. Enright, E.E.M. Furlong, Non-coding RNA  
640 Expression, Function, and Variation during Drosophila Embryogenesis, *Current Biology*, 28 (2018) 3547-  
641 3561.e3549.
- 642 [20] R.D. Finn, J. Clements, W. Arndt, B.L. Miller, T.J. Wheeler, F. Schreiber, A. Bateman, S.R. Eddy, HMMER  
643 web server: 2015 update, *Nucleic acids research*, 43 (2015) W30-W38.
- 644 [21] M.F. Lin, I. Jungreis, M. Kellis, PhyloCSF: a comparative genomics method to distinguish protein coding and  
645 non-coding regions, *Bioinformatics*, 27 (2011) i275-i282.
- 646 [22] J. Chen, A.A. Shishkin, X. Zhu, S. Kadri, I. Maza, M. Guttman, J.H. Hanna, A. Regev, M. Garber, Evolutionary  
647 analysis across mammals reveals distinct classes of long non-coding RNAs, *Genome Biol*, 17 (2016) 19.
- 648 [23] A.R. Quinlan, I.M. Hall, BEDTools: a flexible suite of utilities for comparing genomic features,  
649 *Bioinformatics*, 26 (2010) 841-842.
- 650 [24] Y. Liao, G.K. Smyth, W. Shi, featureCounts: an efficient general purpose program for assigning sequence  
651 reads to genomic features, *Bioinformatics*, 30 (2013) 923-930.
- 652 [25] M.D. Robinson, D.J. McCarthy, G.K. Smyth, edgeR: a Bioconductor package for differential expression  
653 analysis of digital gene expression data, *Bioinformatics*, 26 (2010) 139-140.

- 654 [26] Y. Zhao, H. Li, S. Fang, Y. Kang, W. Wu, Y. Hao, Z. Li, D. Bu, N. Sun, M.Q. Zhang, NONCODE 2016: an  
655 informative and valuable data source of long non-coding RNAs, *Nucleic acids research*, 44 (2015) D203-D208.
- 656 [27] P.-J. Volders, K. Helsens, X. Wang, B. Menten, L. Martens, K. Gevaert, J. Vandesompele, P. Mestdagh,  
657 LNCipedia: a database for annotated human lncRNA transcript sequences and structures, *Nucleic acids*  
658 *research*, 41 (2012) D246-D251.
- 659 [28] L. Ma, A. Li, D. Zou, X. Xu, L. Xia, J. Yu, V.B. Bajic, Z. Zhang, LncRNAWiki: harnessing community knowledge  
660 in collaborative curation of human long non-coding RNAs, *Nucleic acids research*, 43 (2014) D187-D192.
- 661 [29] Q. Liao, H. Xiao, D. Bu, C. Xie, R. Miao, H. Luo, G. Zhao, K. Yu, H. Zhao, G. Skogerbo, R. Chen, Z. Wu, C. Liu,  
662 Y. Zhao, ncFANS: a web server for functional annotation of long non-coding RNAs, *Nucleic acids research*, 39  
663 (2011) W118-124.
- 664 [30] S.L. Cheng, T.K. Bammler, J.Y. Cui, RNA Sequencing Reveals Age and Species Differences of Constitutive  
665 Androstane Receptor-Targeted Drug-Processing Genes in the Liver, *Drug metabolism and disposition: the*  
666 *biological fate of chemicals*, 45 (2017) 867-882.
- 667 [31] P. Langfelder, S. Horvath, WGCNA: an R package for weighted correlation network analysis, *BMC*  
668 *Bioinformatics*, 9 (2008) 559.
- 669 [32] A.M. Yip, S. Horvath, Gene network interconnectedness and the generalized topological overlap measure,  
670 *BMC bioinformatics*, 8 (2007) 22.
- 671 [33] P. Langfelder, B. Zhang, S. Horvath, Defining clusters from a hierarchical cluster tree: the Dynamic Tree Cut  
672 package for R, *Bioinformatics*, 24 (2008) 719-720.
- 673 [34] W.-M. Song, B. Zhang, Multiscale Embedded Gene Co-expression Network Analysis, *PLOS Computational*  
674 *Biology*, 11 (2015) e1004574.
- 675 [35] D.W. Huang, B.T. Sherman, R.A. Lempicki, Systematic and integrative analysis of large gene lists using  
676 DAVID bioinformatics resources, *Nature protocols*, 4 (2008) 44.
- 677 [36] C. Fresno, E.A. Fernández, RDAVIDWebService: a versatile R interface to DAVID, *Bioinformatics*, 29 (2013)  
678 2810-2811.
- 679 [37] A. Gonzalez-Perez, C. Perez-Llamas, J. Deu-Pons, D. Tamborero, M.P. Schroeder, A. Jene-Sanz, A. Santos,  
680 N. Lopez-Bigas, IntOGen-mutations identifies cancer drivers across tumor types, *Nature methods*, 10 (2013)  
681 1081.
- 682 [38] D. Repana, J. Nulsen, L. Dressler, M. Bortolomeazzi, S.K. Venkata, A. Tourna, A. Yakovleva, T. Palmieri, F.D.  
683 Ciccarelli, The network of Cancer genes (NCG): a comprehensive catalogue of known and candidate cancer  
684 genes from cancer sequencing screens, *Genome biology*, 20 (2019) 1.
- 685 [39] M. Zhao, J. Sun, Z. Zhao, TSGene: a web resource for tumor suppressor genes, *Nucleic acids research*, 41  
686 (2012) D970-D976.
- 687 [40] L. Zender, A. Villanueva, V. Tovar, D. Sia, D.Y. Chiang, J.M. Llovet, Cancer gene discovery in hepatocellular  
688 carcinoma, *Journal of hepatology*, 52 (2010) 921-929.
- 689 [41] S. Lotia, J. Montojo, Y. Dong, G.D. Bader, A.R. Pico, Cytoscape app store, *Bioinformatics*, 29 (2013) 1350-  
690 1351.



- 691 [42] A.L. Barabasi, Z.N. Oltvai, Network biology: understanding the cell's functional organization, *Nat Rev*  
692 *Genet*, 5 (2004) 101-113.
- 693 [43] E. Zotenko, J. Mestre, D.P. O'Leary, T.M. Przytycka, Why Do Hubs in the Yeast Protein Interaction Network  
694 Tend To Be Essential: Reexamining the Connection between the Network Topology and Essentiality, *PLOS*  
695 *Computational Biology*, 4 (2008) e1000140.
- 696 [44] H. Yu, P.M. Kim, E. Sprecher, V. Trifonov, M. Gerstein, The importance of bottlenecks in protein networks:  
697 correlation with gene essentiality and expression dynamics, *PLoS computational biology*, 3 (2007) e59.
- 698 [45] C.H. Chin, S.H. Chen, H.H. Wu, C.W. Ho, M.T. Ko, C.Y. Lin, cytoHubba: identifying hub objects and sub-  
699 networks from complex interactome, *BMC Syst Biol*, 8 Suppl 4 (2014) S11.
- 700 [46] T. Le, T. Hoang, J. Li, L. Liu, H. Liu, S. Hu, A fast PC algorithm for high dimensional causal discovery with  
701 multi-core PCs, *IEEE/ACM Trans Comput Biol Bioinform*, (2016).
- 702 [47] J. Zhang, T.D. Le, L. Liu, J. Li, Inferring and analyzing module-specific lncRNA–mRNA causal regulatory  
703 networks in human cancer, *Briefings in Bioinformatics*, (2018) bby008-bby008.
- 704 [48] M. Kalisch, M. Mächler, D. Colombo, pcalg: Estimation of CPDAG/PAG and causal inference using the IDA  
705 algorithm, [UR L http://cran.r-project.org/package= pcalg](http://cran.r-project.org/package=pcalg). R package version, (2010) 1-1.
- 706 [49] M.H. Maathuis, D. Colombo, M. Kalisch, P. Bühlmann, Predicting causal effects in large-scale systems from  
707 observational data, *Nature Methods*, 7 (2010) 247.
- 708 [50] T.D. Le, T. Hoang, J. Li, L. Liu, S. Hu, ParallelPC: an R package for efficient constraint based causal  
709 exploration, *arXiv preprint arXiv:1510.03042*, (2015).
- 710 [51] J. Pearl, *Causality: Models, Reasoning and Inference* Cambridge Univ, Press, 2000.
- 711 [52] S.L. Lauritzen, *Graphical models*, volume 17 of Oxford Statistical Science Series, The Clarendon Press  
712 Oxford University Press, New York, 1996.
- 713 [53] D. Pratt, J. Chen, D. Welker, R. Rivas, R. Pillich, V. Rynkov, K. Ono, C. Miello, L. Hicks, S. Szalma, A.  
714 Stojmirovic, R. Dobrin, M. Braxenthaler, J. Kuentzer, B. Demchak, T. Ideker, NDEx, the Network Data Exchange,  
715 *Cell Syst*, 1 (2015) 302-305.
- 716 [54] J.Y. Cui, C.D. Klaassen, RNA-Seq reveals common and unique PXR- and CAR-target gene signatures in the  
717 mouse liver transcriptome, *Biochimica et biophysica acta*, 1859 (2016) 1198-1217.
- 718 [55] Z. Ren, S. Chen, T. Qing, J. Xuan, L. Couch, D. Yu, B. Ning, L. Shi, L. Guo, Endoplasmic reticulum stress and  
719 MAPK signaling pathway activation underlie leflunomide-induced toxicity in HepG2 Cells, *Toxicology*, 392  
720 (2017) 11-21.
- 721 [56] V.S. Mary, A. Valdehita, J.M. Navas, H.R. Rubinstein, M.L. Fernandez-Cruz, Effects of aflatoxin B(1),  
722 fumonisin B(1) and their mixture on the aryl hydrocarbon receptor and cytochrome P450 1A induction, *Food*  
723 *and chemical toxicology : an international journal published for the British Industrial Biological Research*  
724 *Association*, 75 (2015) 104-111.
- 725 [57] M.P. Franklin, A. Sathyanarayan, D.G. Mashek, Acyl-CoA Thioesterase 1 (ACOT1) Regulates PPARalpha to  
726 Couple Fatty Acid Flux With Oxidative Capacity During Fasting, 66 (2017) 2112-2123.

- 727 [58] K. Takeuchi, K. Reue, Biochemistry, physiology, and genetics of GPAT, AGPAT, and lipin enzymes in  
728 triglyceride synthesis, American journal of physiology. Endocrinology and metabolism, 296 (2009) E1195-  
729 E1209.
- 730 [59] M.-J. Liu, Y. Takahashi, T. Wada, J. He, J. Gao, Y. Tian, S. Li, W. Xie, The Aldo-keto reductase Akr1b7 gene is  
731 a common transcriptional target of xenobiotic receptors pregnane X receptor and constitutive androstane  
732 receptor, Molecular pharmacology, 76 (2009) 604-611.
- 733 [60] Y. Zhang, X. Cheng, L. Aleksunes, C.D. Klaassen, Transcription factor-mediated regulation of  
734 carboxylesterase enzymes in livers of mice, Drug metabolism and disposition: the biological fate of chemicals,  
735 40 (2012) 1191-1197.
- 736 [61] M. Tardelli, T. Claudel, F.V. Bruschi, V. Moreno-Viedma, M. Trauner, Adiponectin regulates AQP3 via  
737 PPARalpha in human hepatic stellate cells, Biochem Biophys Res Commun, 490 (2017) 51-54.
- 738 [62] I.D. Moffat, P.C. Boutros, H. Chen, A.B. Okey, R. Pohjanvirta, Aryl hydrocarbon receptor (AHR)-regulated  
739 transcriptomic changes in rats sensitive or resistant to major dioxin toxicities, BMC genomics, 11 (2010) 263-  
740 263.
- 741 [63] I. Ulitsky, D.P. Bartel, lincRNAs: genomics, evolution, and mechanisms, Cell, 154 (2013) 26-46.
- 742 [64] I. Ulitsky, A. Shkumatava, C.H. Jan, H. Sive, D.P. Bartel, Conserved function of lincRNAs in vertebrate  
743 embryonic development despite rapid sequence evolution, Cell, 147 (2011) 1537-1550.
- 744 [65] C. Lecerf, X. Le Bourhis, E. Adriaenssens, The long non-coding RNA H19: an active player with multiple  
745 facets to sustain the hallmarks of cancer, Cellular and molecular life sciences : CMLS, (2019).
- 746 [66] C. Pope, S. Mishra, J. Russell, Q. Zhou, X.B. Zhong, Targeting H19, an Imprinted Long Non-Coding RNA, in  
747 Hepatic Functions and Liver Diseases, Diseases (Basel, Switzerland), 5 (2017).
- 748 [67] Y. Zhong, C. Yu, W. Qin, LncRNA SNHG14 promotes inflammatory response induced by cerebral  
749 ischemia/reperfusion injury through regulating miR-136-5p /ROCK1, Cancer gene therapy, 26 (2019) 234-247.
- 750 [68] Z. Zhang, Y. Wang, W. Zhang, J. Li, W. Liu, W. Lu, Long non-coding RNA SNHG14 exerts oncogenic functions  
751 in non-small cell lung cancer through acting as an miR-340 sponge, Bioscience reports, 39 (2019).
- 752 [69] P.C. Deng, W.B. Chen, H.H. Cai, Y. An, X.Q. Wu, X.M. Chen, D.L. Sun, Y. Yang, L.Q. Shi, Y. Yang, LncRNA  
753 SNHG14 potentiates pancreatic cancer progression via modulation of annexin A2 expression by acting as a  
754 competing endogenous RNA for miR-613, Journal of cellular and molecular medicine, (2019).
- 755 [70] T. Alam, M. Uludag, M. Essack, A. Salhi, H. Ashoor, J.B. Hanks, C. Kapfer, K. Mineta, T. Gojobori, V.B. Bajic,  
756 FARNA: knowledgebase of inferred functions of non-coding RNA transcripts, Nucleic acids research, 45 (2017)  
757 2838-2848.
- 758 [71] Y. Li, J. Xu, T. Shao, Y. Zhang, H. Chen, X. Li, RNA Function Prediction, Methods in molecular biology  
759 (Clifton, N.J.), 1654 (2017) 17-28.
- 760 [72] M.C. Cave, H.B. Clair, J.E. Hardesty, K.C. Falkner, W. Feng, B.J. Clark, J. Sidey, H. Shi, B.A. Aqel, C.J. McClain,  
761 R.A. Prough, Nuclear receptors and nonalcoholic fatty liver disease, Biochimica et biophysica acta, 1859 (2016)  
762 1083-1099.
- 763 [73] N.T. Tran, H. Su, A. Khodadadi-Jamayran, S. Lin, L. Zhang, D. Zhou, K.M. Pawlik, T.M. Townes, Y. Chen, J.C.  
764 Mulloy, X. Zhao, The AS-RBM15 lncRNA enhances RBM15 protein translation during megakaryocyte  
765 differentiation, 17 (2016) 887-900.

- 766 [74] M.M. Elguindy, F. Kopp, M. Goodarzi, F. Rehfeld, A. Thomas, T.C. Chang, J.T. Mendell, PUMILIO, but not  
767 RBMX, binding is required for regulation of genomic stability by noncoding RNA NORAD, *eLife*, 8 (2019).
- 768 [75] Z. Yang, Y. Zhao, G. Lin, X. Zhou, X. Jiang, H. Zhao, Noncoding RNA activated by DNA damage (NORAD):  
769 Biologic function and mechanisms in human cancers, *Clinica Chimica Acta*, 489 (2019) 5-9.
- 770 [76] Y. Huang, C. Biswas, D.A.K. Dehring, U. Sriram, E.K. Williamson, S. Li, F. Clarke, S. Gallucci, Y. Argon, J.K.  
771 Burkhardt, The actin regulatory protein HS1 is required for antigen uptake and presentation by dendritic cells,  
772 *The Journal of Immunology*, 187 (2011) 5952-5963.
- 773 [77] O. Efimova, P. Szankasi, T.W. Kelley, Ncf1 (p47phox) Is Essential for Direct Regulatory T Cell Mediated  
774 Suppression of CD4+ Effector T Cells, *PLOS ONE*, 6 (2011) e16013.
- 775 [78] G. Wang, A.C. Abadía-Molina, S.B. Berger, X. Romero, M.S. O'Keefe, D.I. Rojas-Barros, M. Aleman, G. Liao,  
776 E. Maganto-García, M. Fresno, N. Wang, C. Detre, C. Terhorst, Cutting edge: Slamf8 is a negative regulator of  
777 Nox2 activity in macrophages, *J Immunol*, 188 (2012) 5829-5832.
- 778 [79] Z. Tuo, Y. Zong, J. Li, J. Liu, HK3 Is Correlated with Immune Infiltrates and Predicts Response to  
779 Immunotherapy in NSCLC, Available at SSRN 3393695, (2019).
- 780 [80] J. George, M. Tsuchishima, M. Tsutsumi, Molecular mechanisms in the pathogenesis of N-  
781 nitrosodimethylamine induced hepatic fibrosis, *Cell death & disease*, 10 (2019) 18.
- 782 [81] H. Kawaratani, T. Tsujimoto, A. Douhara, H. Takaya, K. Moriya, T. Namisaki, R. Noguchi, H. Yoshiji, M.  
783 Fujimoto, H. Fukui, The effect of inflammatory cytokines in alcoholic liver disease, *Mediators Inflamm*, 2013  
784 (2013) 495156.
- 785 [82] S.P. Arlauckas, S.B. Garren, C.S. Garris, R.H. Kohler, J. Oh, M.J. Pittet, R. Weissleder, Arg1 expression  
786 defines immunosuppressive subsets of tumor-associated macrophages, *Theranostics*, 8 (2018) 5842-5854.
- 787 [83] W. Hur, H. Rhim, C.K. Jung, J.D. Kim, S.H. Bae, J.W. Jang, J.M. Yang, S.T. Oh, D.G. Kim, H.J. Wang, S.B. Lee,  
788 S.K. Yoon, SOX4 overexpression regulates the p53-mediated apoptosis in hepatocellular carcinoma: clinical  
789 implication and functional analysis in vitro, *Carcinogenesis*, 31 (2010) 1298-1307.
- 790 [84] Z. Li, M. Tang, B. Ling, S. Liu, Y. Zheng, C. Nie, Z. Yuan, L. Zhou, G. Guo, A. Tong, Y. Wei, Increased  
791 expression of S100A6 promotes cell proliferation and migration in human hepatocellular carcinoma, *Journal of*  
792 *molecular medicine (Berlin, Germany)*, 92 (2014) 291-303.
- 793 [85] S.V. Koduru, A.K. Tiwari, A. Leberfinger, S.W. Hazard, Y.I. Kawasawa, M. Mahajan, D.J. Ravnich, A  
794 Comprehensive NGS Data Analysis of Differentially Regulated miRNAs, piRNAs, lncRNAs and sn/snoRNAs in  
795 Triple Negative Breast Cancer, *J Cancer*, 8 (2017) 578-596.
- 796 [86] M. Zhou, M. Guo, D. He, X. Wang, Y. Cui, H. Yang, D. Hao, J. Sun, A potential signature of eight long non-  
797 coding RNAs predicts survival in patients with non-small cell lung cancer, *Journal of translational medicine*, 13  
798 (2015) 231-231.
- 799 [87] M.A. Peraza, A.D. Burdick, H.E. Marin, F.J. Gonzalez, J.M. Peters, The Toxicology of Ligands for Peroxisome  
800 Proliferator-Activated Receptors (PPAR), *Toxicological Sciences*, 90 (2006) 269-295.
- 801 [88] X. Chen, B. Song, Y. Lin, L. Cao, S. Feng, L. Zhang, F. Wang, PTK6 promotes hepatocellular carcinoma cell  
802 proliferation and invasion, *Am J Transl Res*, 8 (2016) 4354-4361.

- 803 [89] N. Ouyang, J.L. Williams, B. Rigas, NO-donating aspirin isomers downregulate peroxisome proliferator-  
804 activated receptor (PPAR) $\delta$  expression in APCmin /+ mice proportionally to their tumor inhibitory effect:  
805 Implications for the role of PPAR $\delta$  in carcinogenesis, *Carcinogenesis*, 27 (2006) 232-239.
- 806 [90] S. Majumder, S. Roy, T. Kaffenberger, B. Wang, S. Costinean, W. Frankel, A. Bratasz, P. Kuppusamy, T. Hai,  
807 K. Ghoshal, S.T. Jacob, Loss of metallothionein predisposes mice to diethylnitrosamine-induced  
808 hepatocarcinogenesis by activating NF-kappaB target genes, *Cancer Res*, 70 (2010) 10265-10276.
- 809 [91] O. Neumann, M. Kesselmeier, R. Geffers, R. Pellegrino, B. Radlwimmer, K. Hoffmann, V. Ehemann, P.  
810 Schemmer, P. Schirmacher, J. Lorenzo Bermejo, T. Longerich, Methylome analysis and integrative profiling of  
811 human HCCs identify novel protumorigenic factors, *Hepatology (Baltimore, Md.)*, 56 (2012) 1817-1827.
- 812 [92] T. Schmelzle, A.A. Mailleux, M. Overholtzer, J.S. Carroll, N.L. Solimini, E.S. Lightcap, O.P. Veiby, J.S. Brugge,  
813 Functional role and oncogene-regulated expression of the BH3-only factor Bmf in mammary epithelial anoikis  
814 and morphogenesis, *Proceedings of the National Academy of Sciences*, 104 (2007) 3787-3792.
- 815 [93] J.U. Marquardt, D. Seo, J.B. Andersen, M.C. Gillen, M.S. Kim, E.A. Conner, P.R. Galle, V.M. Factor, Y.N. Park,  
816 S.S. Thorgeirsson, Sequential transcriptome analysis of human liver cancer indicates late stage acquisition of  
817 malignant traits, *Journal of hepatology*, 60 (2014) 346-353.
- 818 [94] L. Gramantieri, F. Fornari, M. Ferracin, A. Veronese, S. Sabbioni, G.A. Calin, G.L. Grazi, C.M. Croce, L.  
819 Bolondi, M. Negrini, MicroRNA-221 targets Bmf in hepatocellular carcinoma and correlates with tumor  
820 multifocality, *Clinical cancer research*, (2009) 1078-0432. CCR-1009-0092.
- 821 [95] L. Coultas, S. Terzano, T. Thomas, A. Voss, K. Reid, E.G. Stanley, C.L. Scott, P. Bouillet, P. Bartlett, J. Ham,  
822 J.M. Adams, A. Strasser, Hrk/DP5 contributes to the apoptosis of select neuronal populations but is  
823 dispensable for haematopoietic cell apoptosis, *Journal of cell science*, 120 (2007) 2044-2052.
- 824 [96] E.L. Guimaraes, L. Stradiot, I. Mannaerts, B. Schroyen, L.A. van Grunsven, P311 modulates hepatic stellate  
825 cells migration, *Liver international : official journal of the International Association for the Study of the Liver*,  
826 35 (2015) 1253-1264.
- 827 [97] G.D. Norata, S. Tsimikas, A. Pirillo, A.L. Catapano, Apolipoprotein C-III: From Pathophysiology to  
828 Pharmacology, *Trends in pharmacological sciences*, 36 (2015) 675-687.
- 829 [98] K. Nguyen, Y. Yan, B. Yuan, A. Dasgupta, J.C. Sun, H. Mu, K.-A. Do, N.T. Ueno, M. Andreeff, V.L. Battula,  
830 ST8SIA1 regulates tumor growth and metastasis in TNBC by activating the FAK-AKT-mTOR signaling pathway,  
831 *Molecular Cancer Therapeutics*, (2018) molcanther.0399.2018.
- 832 [99] M. Bobowski, A. Vincent, A. Steenackers, F. Colomb, I. Van Seuningen, S. Julien, P. Delannoy, Estradiol  
833 represses the G(D3) synthase gene ST8SIA1 expression in human breast cancer cells by preventing NFkB  
834 binding to ST8SIA1 promoter, *PLoS one*, 8 (2013) e62559-e62559.
- 835 [100] G. Gao, F.J. Chen, L. Zhou, L. Su, D. Xu, L. Xu, P. Li, Control of lipid droplet fusion and growth by CIDE  
836 family proteins, *Biochimica et biophysica acta. Molecular and cell biology of lipids*, 1862 (2017) 1197-1204.
- 837 [101] L. Zhou, L. Xu, J. Ye, D. Li, W. Wang, X. Li, L. Wu, H. Wang, F. Guan, P. Li, Cidea promotes hepatic steatosis  
838 by sensing dietary fatty acids, *Hepatology (Baltimore, Md.)*, 56 (2012) 95-107.
- 839 [102] C.-T. Yeh, S.-C. Lu, I.-C. Tseng, H.-Y. Lai, M.-L. Tsao, S.-F. Huang, Y.-F. Liaw, Antisense overexpression of  
840 BMAL2 enhances cell proliferation, *Oncogene*, 22 (2003) 5306.

- 841 [103] J.H. Noh, K.M. Kim, W.G. McClusky, K. Abdelmohsen, M. Gorospe, Cytoplasmic functions of long  
842 noncoding RNAs, *Wiley interdisciplinary reviews. RNA*, 9 (2018) e1471.
- 843 [104] B.A. Kandel, M. Thomas, S. Winter, G. Damm, D. Seehofer, O. Burk, M. Schwab, U.M. Zanger,  
844 Genomewide comparison of the inducible transcriptomes of nuclear receptors CAR, PXR and PPARalpha in  
845 primary human hepatocytes, *Biochimica et biophysica acta*, 1859 (2016) 1218-1227.
- 846 [105] J. Tian, R. Marino, C. Johnson, J. Locker, Binding of Drug-Activated CAR/Nr1i3 Alters Metabolic Regulation  
847 in the Liver, *iScience*, 9 (2018) 209-228.
- 848 [106] A. Di Fiore, D.M. Monti, A. Scaloni, G. De Simone, S.M. Monti, Protective Role of Carbonic Anhydrases III  
849 and VII in Cellular Defense Mechanisms upon Redox Unbalance, *Oxidative medicine and cellular longevity*,  
850 2018 (2018).
- 851 [107] T. Strid, C. Karlsson, M. Soderstrom, J. Zhang, H. Qian, M. Sigvardsson, S. Hammarstrom, Fetal hepatic  
852 expression of 5-lipoxygenase activating protein is confined to colonizing hematopoietic cells, *Biochem Biophys  
853 Res Commun*, 383 (2009) 336-339.
- 854 [108] F. Hong, S. Yang, Ischemic preconditioning decreased leukotriene C4 formation by depressing leukotriene  
855 C4 synthase expression and activity during hepatic I/R injury in rats, *Journal of Surgical Research*, 178 (2012)  
856 1015-1021.
- 857 [109] J.M. Peters, R.C. Cattley, F.J. Gonzalez, Role of PPAR alpha in the mechanism of action of the  
858 nongenotoxic carcinogen and peroxisome proliferator Wy-14,643, *Carcinogenesis*, 18 (1997) 2029-2033.
- 859 [110] N. Kiyosawa, J.C. Kwekel, L.D. Burgoon, E. Dere, K.J. Williams, C. Tashiro, B. Chittim, T.R. Zacharewski,  
860 Species-specific regulation of PXR/CAR/ER-target genes in the mouse and rat liver elicited by o, p'-DDT, *BMC  
861 genomics*, 9 (2008) 487.
- 862 [111] C.A. Flaveny, G.H. Perdew, Transgenic Humanized AHR Mouse Reveals Differences between Human and  
863 Mouse AHR Ligand Selectivity, *Molecular and cellular pharmacology*, 1 (2009) 119-123.
- 864 [112] M.M. Tabb, V. Kholodovych, F. Grun, C. Zhou, W.J. Welsh, B. Blumberg, Highly chlorinated PCBs inhibit  
865 the human xenobiotic response mediated by the steroid and xenobiotic receptor (SXR), *Environmental health  
866 perspectives*, 112 (2004) 163-169.
- 867 [113] Y. Hu, J. Pan, Y. Xin, X. Mi, J. Wang, Q. Gao, H. Luo, Gene Expression Analysis Reveals Novel Gene  
868 Signatures Between Young and Old Adults in Human Prefrontal Cortex, *Front Aging Neurosci*, 10 (2018) 259.
- 869 [114] J.N. Savas, Y.-Z. Wang, L.A. DeNardo, S. Martinez-Bartolome, D.B. McClatchy, T.J. Hark, N.F. Shanks, K.A.  
870 Cozzolino, M. Lavallée-Adam, S.N. Smukowski, Amyloid Accumulation Drives Proteome-wide Alterations in  
871 Mouse Models of Alzheimer's Disease-like Pathology, *Cell reports*, 21 (2017) 2614-2627.
- 872 [115] L. Josset, N. Tchitchek, L.E. Gralinski, M.T. Ferris, A.J. Einfeld, R.R. Green, M.J. Thomas, J. Tisoncik-Go, G.P.  
873 Schroth, Y. Kawaoka, F.P. Manuel de Villena, R.S. Baric, M.T. Heise, X. Peng, M.G. Katze, Annotation of long  
874 non-coding RNAs expressed in collaborative cross founder mice in response to respiratory virus infection  
875 reveals a new class of interferon-stimulated transcripts, *RNA Biol*, 11 (2014) 875-890.
- 876 [116] K. Chella Krishnan, Z. Kurt, R. Barrere-Cain, S. Sabir, A. Das, R. Floyd, L. Vergnes, Y. Zhao, N. Che, S.  
877 Charugundla, H. Qi, Z. Zhou, Y. Meng, C. Pan, M.M. Seldin, F. Norheim, S. Hui, K. Reue, A.J. Lusis, X. Yang,  
878 Integration of Multi-omics Data from Mouse Diversity Panel Highlights Mitochondrial Dysfunction in Non-  
879 alcoholic Fatty Liver Disease, *Cell Syst*, 6 (2018) 103-115 e107.

- 880 [117] Z. Kurt, R. Barrere-Cain, J. LaGuardia, M. Mehrabian, C. Pan, S.T. Hui, F. Norheim, Z. Zhou, Y. Hasin, A.J.  
881 Lusi, X. Yang, Tissue-specific pathways and networks underlying sexual dimorphism in non-alcoholic fatty liver  
882 disease, *Biol Sex Differ*, 9 (2018) 46.
- 883 [118] Y. Uchida, K. Izai, T. Orii, T. Hashimoto, Novel fatty acid beta-oxidation enzymes in rat liver mitochondria.  
884 II. Purification and properties of enoyl-coenzyme A (CoA) hydratase/3-hydroxyacyl-CoA dehydrogenase/3-  
885 ketoacyl-CoA thiolase trifunctional protein, *Journal of Biological Chemistry*, 267 (1992) 1034-1041.
- 886 [119] E.G. Williams, Y. Wu, P. Jha, S. Dubuis, P. Blattmann, C.A. Argmann, S.M. Houten, T. Amariuta, W. Wolski,  
887 N. Zamboni, Systems proteomics of liver mitochondria function, *Science*, 352 (2016) aad0189.
- 888 [120] M. Kalisch, M. Machler, D. Colombo, M.H. Maathuis, P. Buhlmann, Causal Inference Using Graphical  
889 Models with the R Package pcalg, *Journal of Statistical Software*, 47 (2012) 1-26.
- 890 [121] J. Zhang, T.D. Le, L. Liu, B. Liu, J. He, G.J. Goodall, J. Li, Identifying direct miRNA–mRNA causal regulatory  
891 relationships in heterogeneous data, *Journal of biomedical informatics*, 52 (2014) 438-447.
- 892 [122] T.D. Le, L. Liu, A. Tsykin, G.J. Goodall, B. Liu, B.Y. Sun, J. Li, Inferring microRNA-mRNA causal regulatory  
893 relationships from expression data, *Bioinformatics*, 29 (2013) 765-771.
- 894 [123] I. Ulitsky, Evolution to the rescue: using comparative genomics to understand long non-coding RNAs, *Nat*  
895 *Rev Genet*, 17 (2016) 601-614.
- 896 [124] D.J. Lemler, H.N. Brochu, F. Yang, E.A. Harrell, X. Peng, Elucidating the Role of Host Long Non-Coding RNA  
897 during Viral Infection: Challenges and Paths Forward, *Vaccines*, 5 (2017) 37.
- 898 [125] Z. Cong, Y. Diao, Y. Xu, X. Li, Z. Jiang, C. Shao, S. Ji, Y. Shen, W. De, Y. Qiang, Long non-coding RNA  
899 linc00665 promotes lung adenocarcinoma progression and functions as ceRNA to regulate AKR1B10-ERK  
900 signaling by sponging miR-98, *Cell death & disease*, 10 (2019) 84.
- 901 [126] H. Guo, S. Yang, S. Li, M. Yan, L. Li, H. Zhang, LncRNA SNHG20 promotes cell proliferation and invasion via  
902 miR-140-5p-ADAM10 axis in cervical cancer, *Biomedicine & Pharmacotherapy*, 102 (2018) 749-757.
- 903 [127] X. Deng, X.F. Zhao, X.Q. Liang, R. Chen, Y.F. Pan, J. Liang, Linc00152 promotes cancer progression in  
904 hepatitis B virus-associated hepatocellular carcinoma, *Biomedicine & pharmacotherapy = Biomedecine &*  
905 *pharmacotherapie*, 90 (2017) 100-108.
- 906 [128] C. Maletzki, P. Bodammer, A. Breitrück, C. Kerkhoff, S100 proteins as diagnostic and prognostic markers  
907 in colorectal and hepatocellular carcinoma, *Hepatitis monthly*, 12 (2012) e7240-e7240.
- 908 [129] R.J. Kavlock, G. Ankley, J. Blancato, M. Breen, R. Conolly, D. Dix, K. Houck, E. Hubal, R. Judson, J.  
909 Rabinowitz, A. Richard, R.W. Setzer, I. Shah, D. Villeneuve, E. Weber, Computational toxicology--a state of the  
910 science mini review, *Toxicol Sci*, 103 (2008) 14-27.
- 911 [130] S. Ben-Moshe, S. Itzkovitz, Spatial heterogeneity in the mammalian liver, *Nature reviews.*  
912 *Gastroenterology & hepatology*, 16 (2019) 395-410.
- 913
- 914

915 **Figure legends**

916 **Scheme 1. Modes of actions (MoA) for 27 xenobiotic exposures.** Shown are schematic diagrams of  
917 three MOA of each set of chemicals, and the numbers of livers included in each dataset. **A**, CAR/PXR; **B**,  
918 PPAR; **C**, ER; **D**, AhR; **E**, HMG-CoAR; **F**, cytotoxicity and DNA damage agents.

919

920 **Figure 1.** Computational framework for discovery of regulatory xeno-lnc.

921

922 **Figure 2. Clustering of xeno-lncs and PCGs responsive to one or more chemicals.** Shown are heat  
923 maps for differentially regulated genes in rat liver that respond to 27 different chemical exposures.  
924 Chemicals are color-coded by MOA, which is indicated following the abbreviated chemical names  
925 (see **Table S1**). **A**. 1,447 lncRNAs and **B**. 2,637 PCGs up-regulated (blue) or down-regulated (red) by  
926 one or more chemicals. **C**. 32 xeno-lncs and 66 PCGs that responded significantly ( $|\text{fold-change (FC)}|$   
927  $> 4$ ,  $\text{FDR} < 0.05$ ) to at least two of the three AhR agonists. **D**. 123 xeno-lncs that respond to at least 10  
928 of the 27 chemicals. **E**. 13 PCGs and five xeno-lncs that respond to  $\geq 20$  chemicals.

929

930 **Figure 3. lncRNA orthology.** **A**. Shown are the number of mouse and human orthologs discovered for  
931 5,975 rat liver lncRNAs and the subset of 1,447 xeno-lncs, based on a TTI or TGI cutoff  $> 30\%$ . **B**. Rat  
932 rlnC449 is orthologous with human lncRNA H19. Shown is the alignment between the two orthologs  
933 (top) and rat liver expression data for rlnC449 across 27 chemicals (bottom). Colors are used to mark  
934 expression data for chemicals in each MOA. Gene responses ( $\log_2$  FC values) are shown on the y-axis.  
935 White bars represent non-significant responses ( $\text{FDR} \geq 0.05$ ). **C**. Rat rlnC397 aligned with its mouse  
936 ortholog lncRNA Snhg14, and expression data for rat liver rlnC397, as in B.

937

938 **Figure 4. Fatty acid metabolism-enriched module C9.** Fatty acid metabolism genes are marked with  
939 blue nodes. Network submodules (C-59, C-60, C-61) are represented by other colors, as indicated.  
940 Thirty-five nodes in the network are PPAR marker genes (dark red node border color). lncRNA hubs  
941 or bottlenecks: Three xeno-lncs in the module are hubs (rlnC3428, rlnC788, rlnC787) and four are both  
942 hubs and bottlenecks (rlnC3427, rlnC1514, rlnC973, rlnC1002). The full network is shown in Figure S6;  
943 this excerpted segment shows xeno-lncs directly connected to PCGs that are either: involved in fatty  
944 acid metabolism, PPAR markers, or are hub or bottlenecks. The legend (in box) describes nodes and  
945 edge properties in co-expression and causal networks. Nodes represent genes or xeno-lncs, and an  
946 edge shows the relationship between two nodes, with a correlation or absolute value of causal effect  
947 (causation). PCGs and xeno-lncs are represented as network nodes with circle and square shapes,  
948 respectively. lncRNA orthologs (human, mouse, or both human and mouse) are marked using  
949 different symbols. Edges in the co-expression network correspond to correlation values between the  
950 two connected nodes (genes or lncRNAs), marked as a line. Arrows are used in causal networks to  
951 indicate causality between regulatory lncRNAs and their PCGs targets. Green edges show positive  
952 associations and red edges represent negative associations. Critical nodes (hubs, bottlenecks, or  
953 hub-bottlenecks) are shown using different node shapes and with a node color. PCGs that are either  
954 cancer drivers or tumor suppressors are labelled in red text enclosed in square brackets. The same  
955 legend applies to Figures 5-8.

956

957 **Figure 5 – Cell cycle-enriched module C13.** **A**. Shown is module C13 (PCG: 104, xeno-lncs: 6).

958 **B.** Heat map showing two-way hierarchical clustering of gene responses (in log<sub>2</sub> FC) for oncogenes  
959 and their connected xeno-lncs from module C13, across 27 chemical exposures. Xeno-lnc rlnC3587  
960 (red arrow) was up-regulated by 10 of the chemicals.

961

962 **Figure 6 – Subnetworks involving hub and bottleneck genes in module C7.**

963 **A.** rlnC2830, a hub gene from module C7, is positively co-expressed with nine PCGs involved in  
964 immune response. **B.** Responses of rlnC2830 and its PCG partners across 27 chemicals (in log<sub>2</sub> FC). **C.**  
965 rlnC1130, a hub gene connected to six genes in module C7 and rlnC1023, a hub–bottleneck gene with  
966 connections to nine genes. **D.** Responses of rlnC1130 and rlnC1023 and their PCG partners across 27  
967 chemicals (in log<sub>2</sub> FC).

968

969 **Figure 7. lncRNA–PCG causal network enriched for different biological processes.** Each directed  
970 edge (arrows) represents a causal effect (absolute causal effect value > 0.5) of a xeno-lnc (diamond  
971 shapes) on the expression of a PCG. Ortholog information is represented by different node colors  
972 with node description added for functionally well–characterized lncRNAs.

973

974 **Figure 8. Sub-networks containing five xeno-lncs responsive to 20 or more multiple chemicals and  
975 their gene associations in network modules.** Shown are sub–network derived from module C14  
976 along with all direct connections and causal relationships (marked by directed edges) for: **A.** rlnC1425  
977 and rlnC715, **B.** rlnC2750, and **C.** rlnC3088. **D.** Sub–network derived from module C12 showing all  
978 causal and correlation based associations for rlnC4657.

979

## 980 **Supplemental figures**

981 **Figure S1.** Module and sub–module hierarchy for MEGENA modules. MEGENA uses a divisive  
982 clustering approach and discovers co-expression modules in a multi-layer manner. The innermost  
983 core, C1\_1, contains all 2,637 PCGs and 1,447 xeno-lncs, which are clustered into 13 gene modules in  
984 layer 1 (C1\_3 to C1\_15). Gene modules in layer 1 are further clustered into smaller compact  
985 sub–modules in layer 2. This process continues until no further compact child clusters are formed.

986

987 **Figure S2.** Gene expression data for xeno-lncs (A) and protein coding genes (PCGs) (B) that are  
988 consistently induced or repressed by  $\geq 20$  of the 27 chemicals examined. Data are shown as log<sub>2</sub> fold-  
989 change (FC) values along the Y-axis. Bars shown in white, FDR < 0.05. **A.** Five lncRNAs (rlnC4657,  
990 rlnC3088, rlnC715, rlnC1425, and rlnC2750) showed down regulation in 20 or more chemicals. **B.**  
991 Sult2a was up regulated by 22 out of 27 chemicals, and Ltc4s gene was down-regulated by 22 out of  
992 27 chemicals. Acot1 was up-regulated by 21 chemicals, but was down-regulated by two of the three  
993 AhR agonists, and by aflatoxin–B1, which also has AhR agonist activity (see text). Bars are colored  
994 according to the MOA of each chemical.

995

996 **Figure S3.** Gene expression profiles across all 27 chemicals for representative MOA-selective marker  
997 genes, including PCGs (A) and xeno-lncs (B). Gene expression data is in log<sub>2</sub> FC values (y-axis), and bars  
998 are colored according to the MOA of each chemical. White bars, FDR < 0.05.



999

1000 **Figure S4A.** Rat–mouse ortholog responses to xenobiotics that are activators of CAR or PXR.

1001 **A,** Heatmap of 140 rat xeno-lncs whose mouse orthologs was significantly dysregulated by a CAR or  
1002 PXR agonists in one of the mouse datasets (see text). Data are displayed by hierarchical clustering  
1003 using Euclidean distance metric and Ward.d2 minimum variance criterion. Each row represents a  
1004 lncRNA rat–mouse ortholog pair and each column represents one gene expression dataset.

1005 **B,** Expression data for select rat-mouse xeno-lnc orthog pairs (top) and of four PCGs co-expressed  
1006 with the orthologs pair rlnC2209-mlnc3859 (bottom).

1007

1008 **Figure S5.** Module C10, which is highly enriched in ER marker genes. Xeno-lncs occupying central  
1009 position as hubs and bottlenecks for module C10 that contained all 50 ER markers.

1010

1011 **Figure S6.** Complete network of module C9, which is enriched for fatty acid metabolism terms. Fatty  
1012 acid metabolism genes are represented by nodes shown in blue. Network submodules (C–59, C–60,  
1013 C–61) are represented by different colors.

1014

1015 **Figure S7.** Oncogenic sub–network derived from module C13. This module includes 35 PCGs with  
1016 cancer–associated roles, either as oncogenic drivers or tumor suppressors (TSGs). Five xeno-lncs are  
1017 connected directly to these genes.

1018

1019 **Figure S8A.** Heatmap presenting gene response for oncogenic genes from Module C7, which is  
1020 enriched for immune response genes. The 125 oncogenes (black text) genes displayed here are  
1021 connected to one or more of 49 xeno-lncs (gold text). We observed a small cluster (marked at the  
1022 bottom as a dotted rectangle) that was robustly down-regulated across all chemical exposures. Xeno-  
1023 lnc rlnC4110 (blue arrow) was induced across all conditions. In addition, we identified several known  
1024 lncRNA orthologs (red arrows). **B.** Oncogenic gene sub-network, excerpted from module C7. This  
1025 network presents oncogenic genes and their direct xeno-lnc neighbors. Three of the onco-lnc  
1026 orthologs shown, lnc-CYTOR, linc00941, RP11-405F3.4, are connected to critical node genes in the  
1027 network.

1028

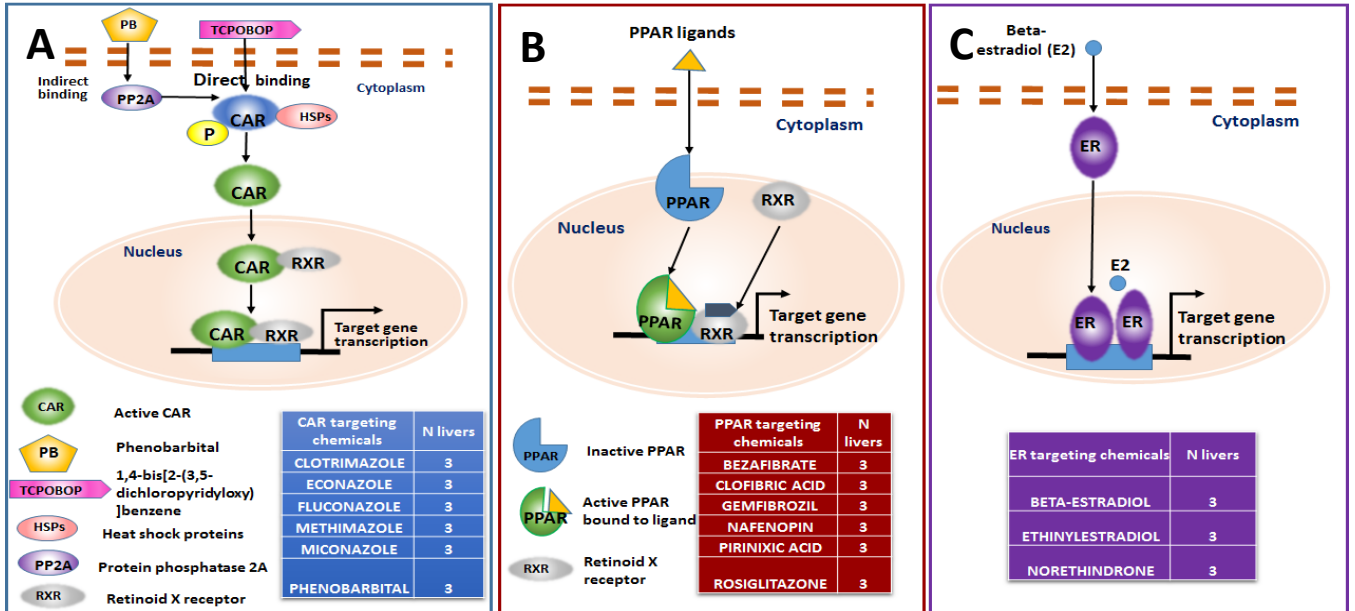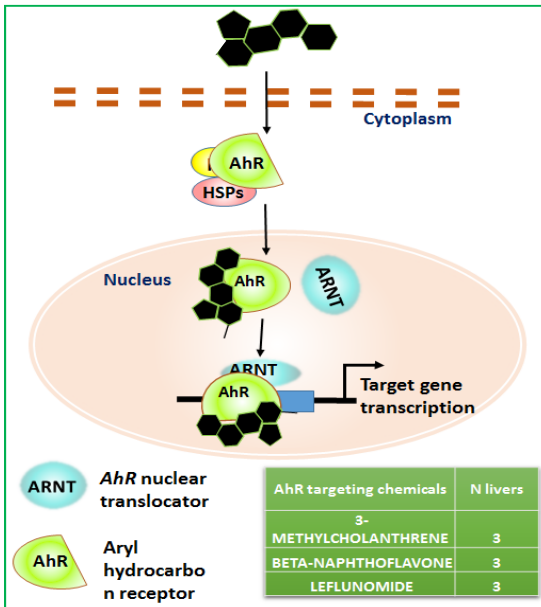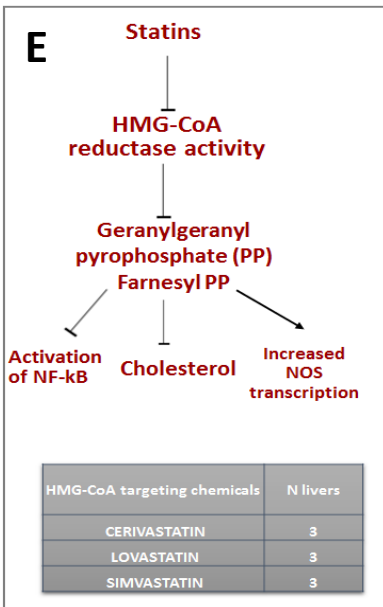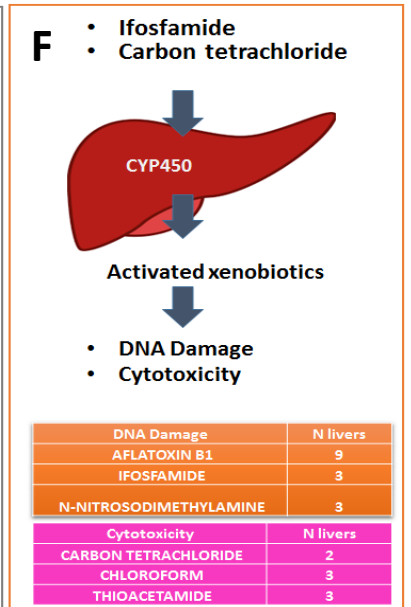

Figure 1

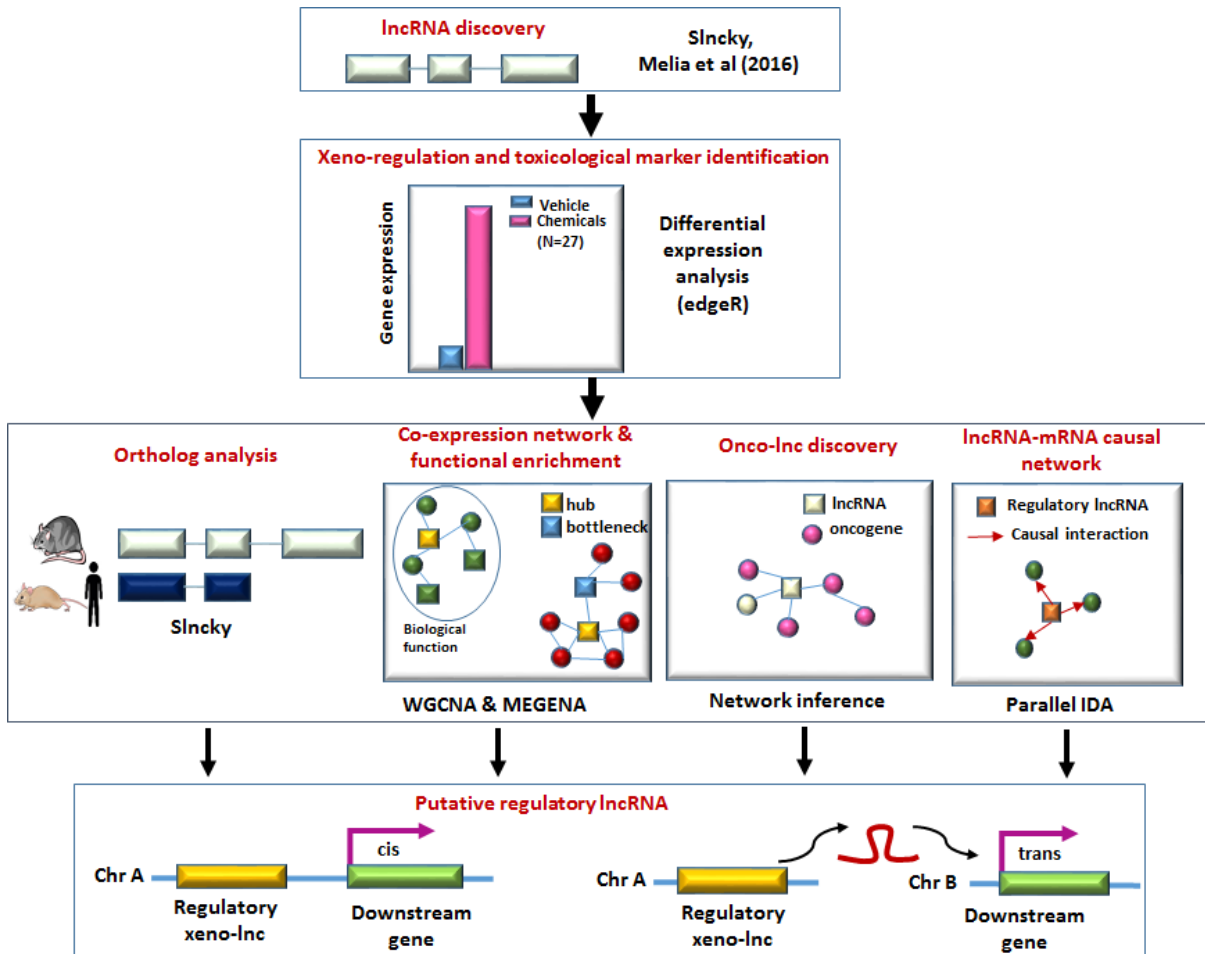

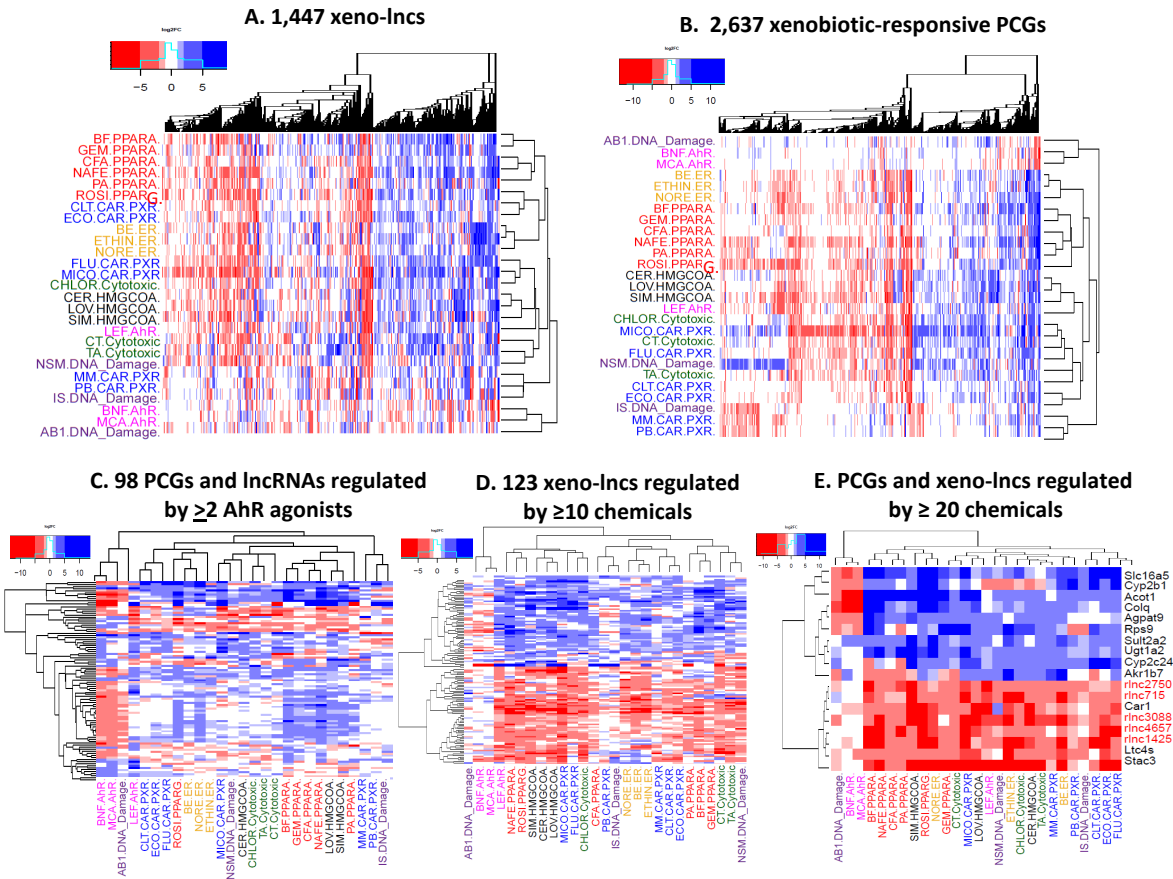

**A.**

| Rat lncRNA orthologs   | Human Only Orthologs | Mouse Only Orthologs | Both (Human and mouse) | Total orthologs |
|------------------------|----------------------|----------------------|------------------------|-----------------|
| Total lncRNAs (N=5795) | 644 (11.4%)          | 984 (17%)            | 1392 (29%)             | 3020 (52%)      |
| Xeno-lncs (N=1447)     | 179 (12.3%)          | 267 (18.4%)          | 328 (23%)              | 774 (53.4%)     |

**B. rlnC449 (H19)**

**C. rlnC397 (Snhg14)**

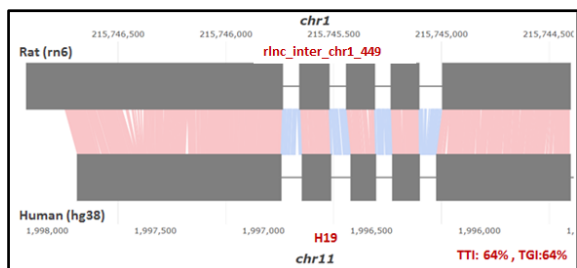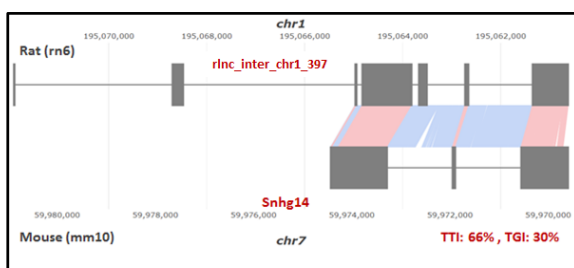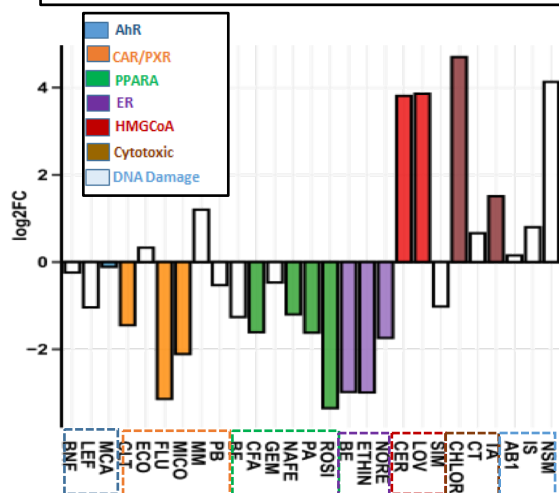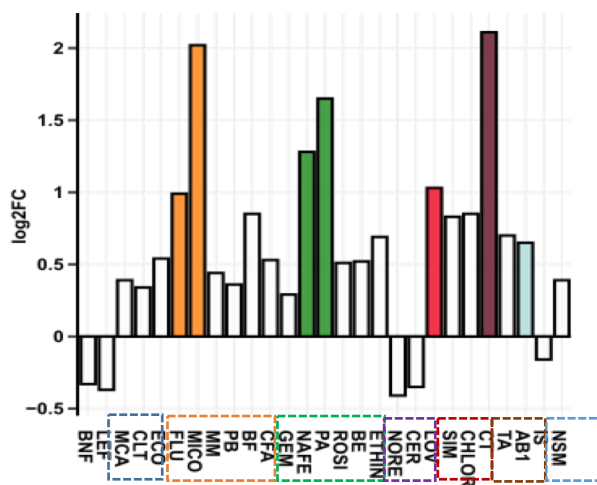

Figure 4

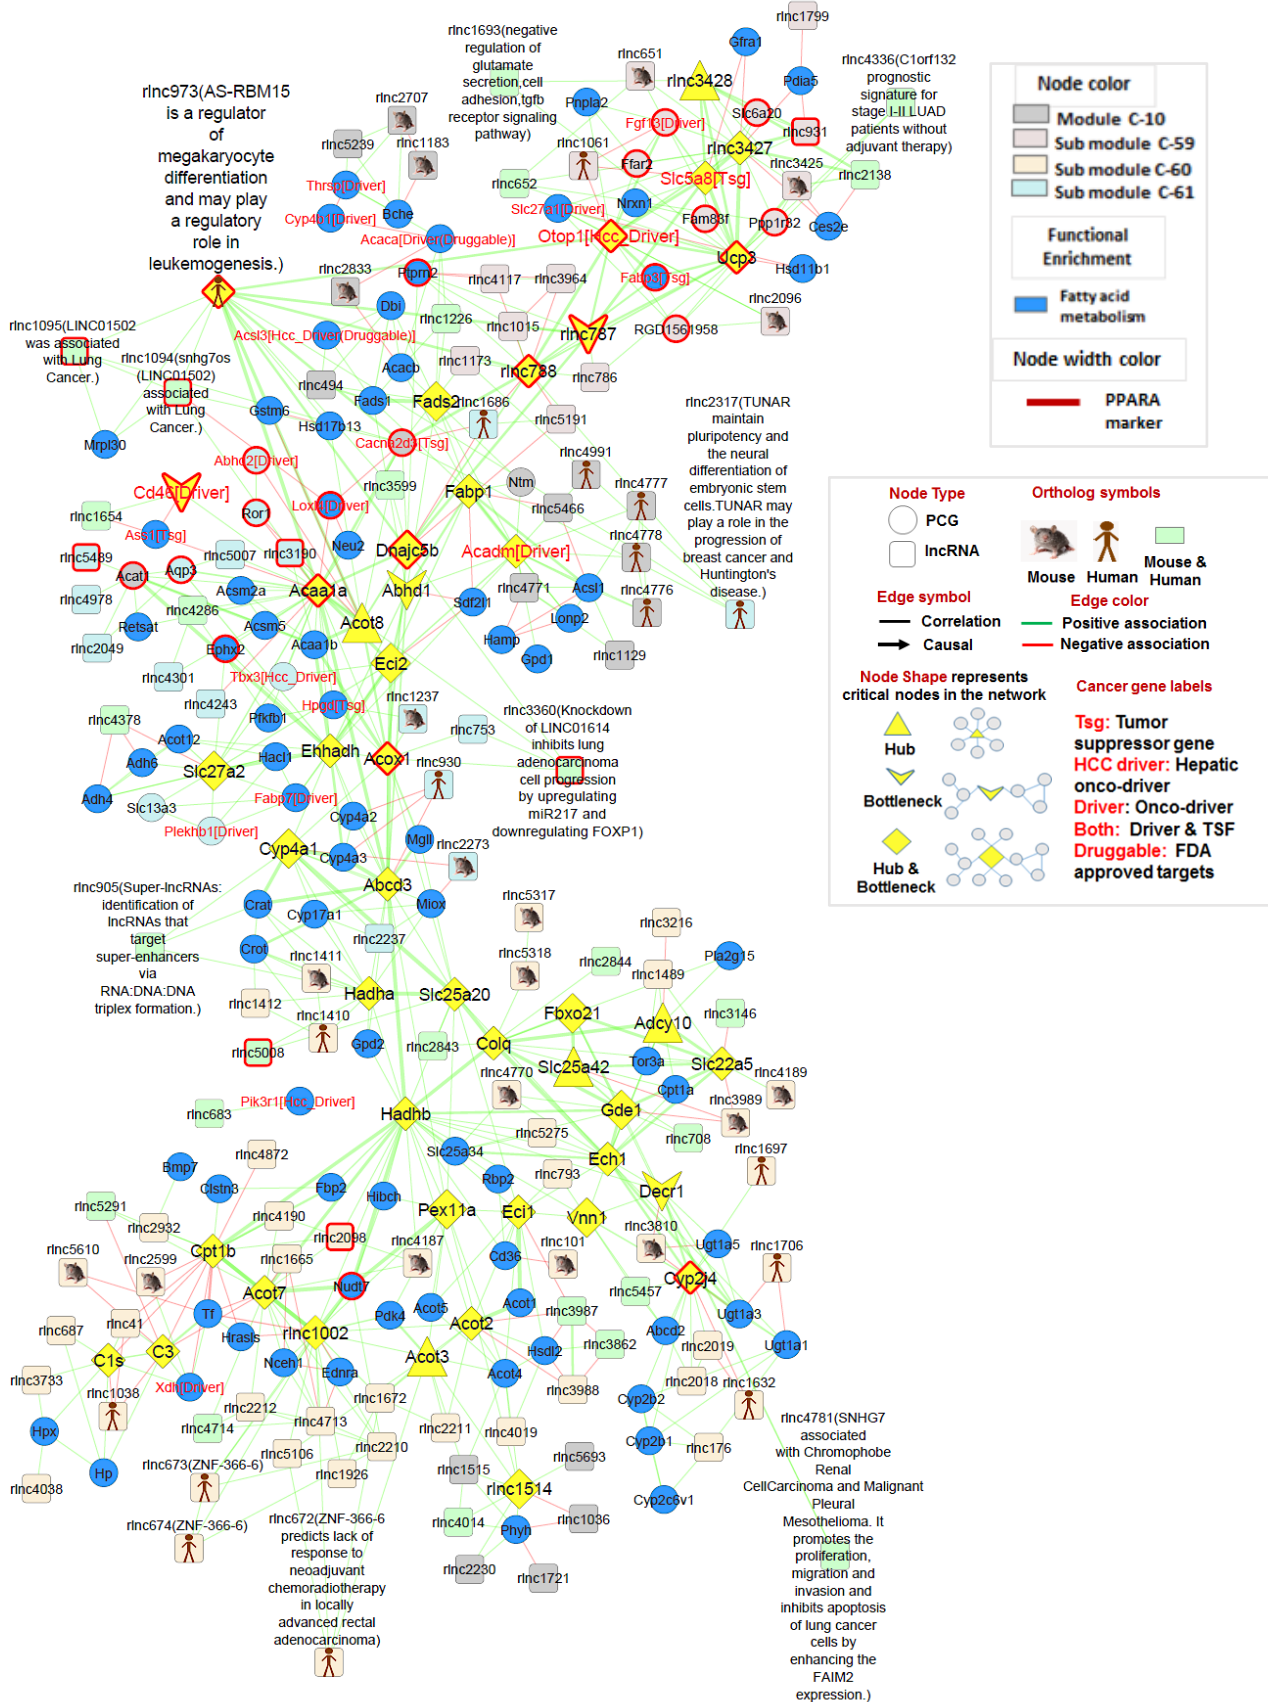

Figure 5

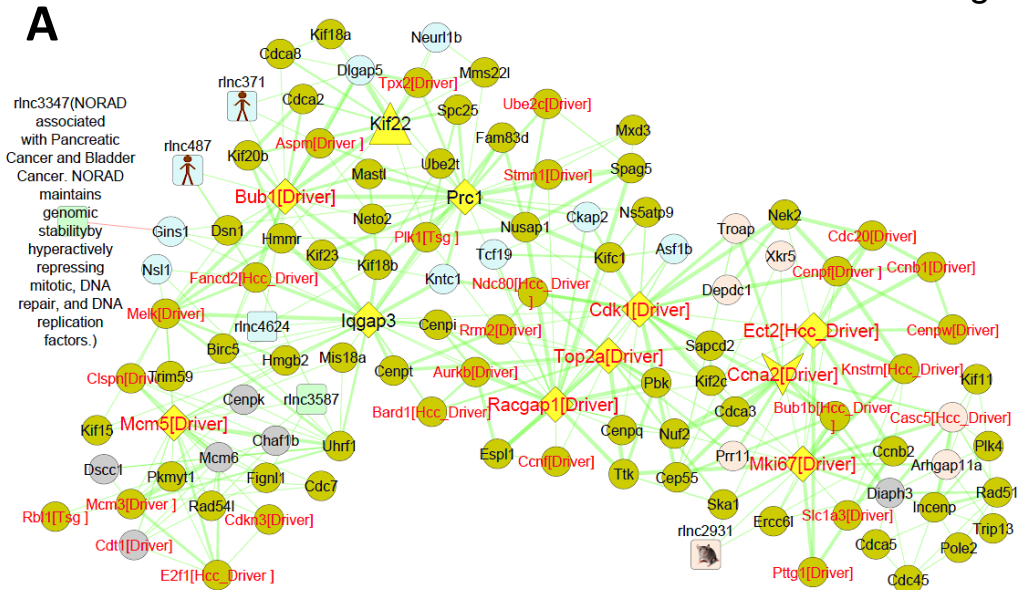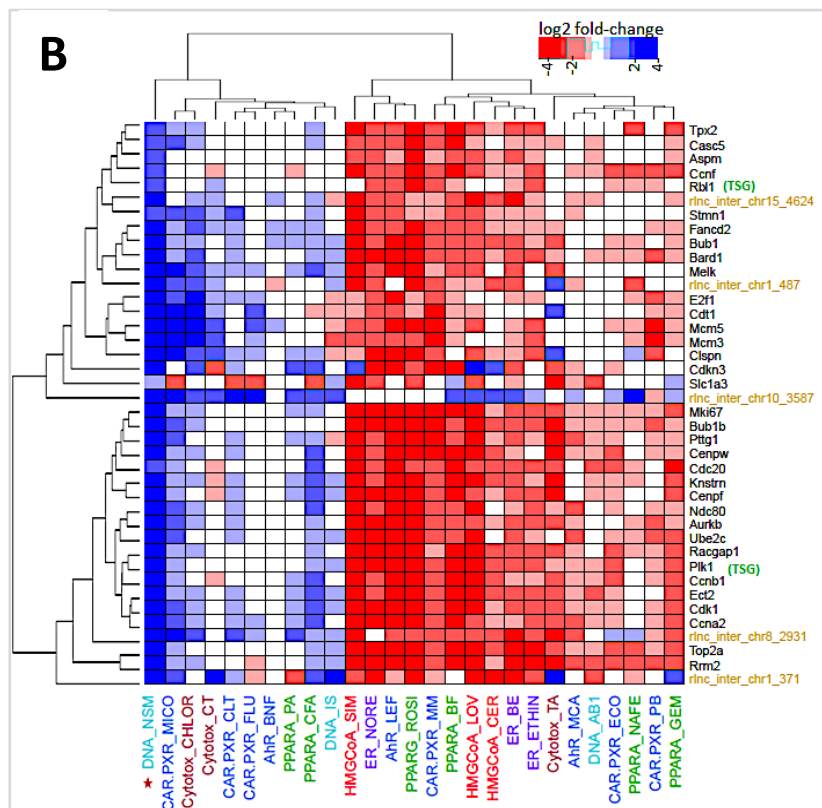

Figure 6

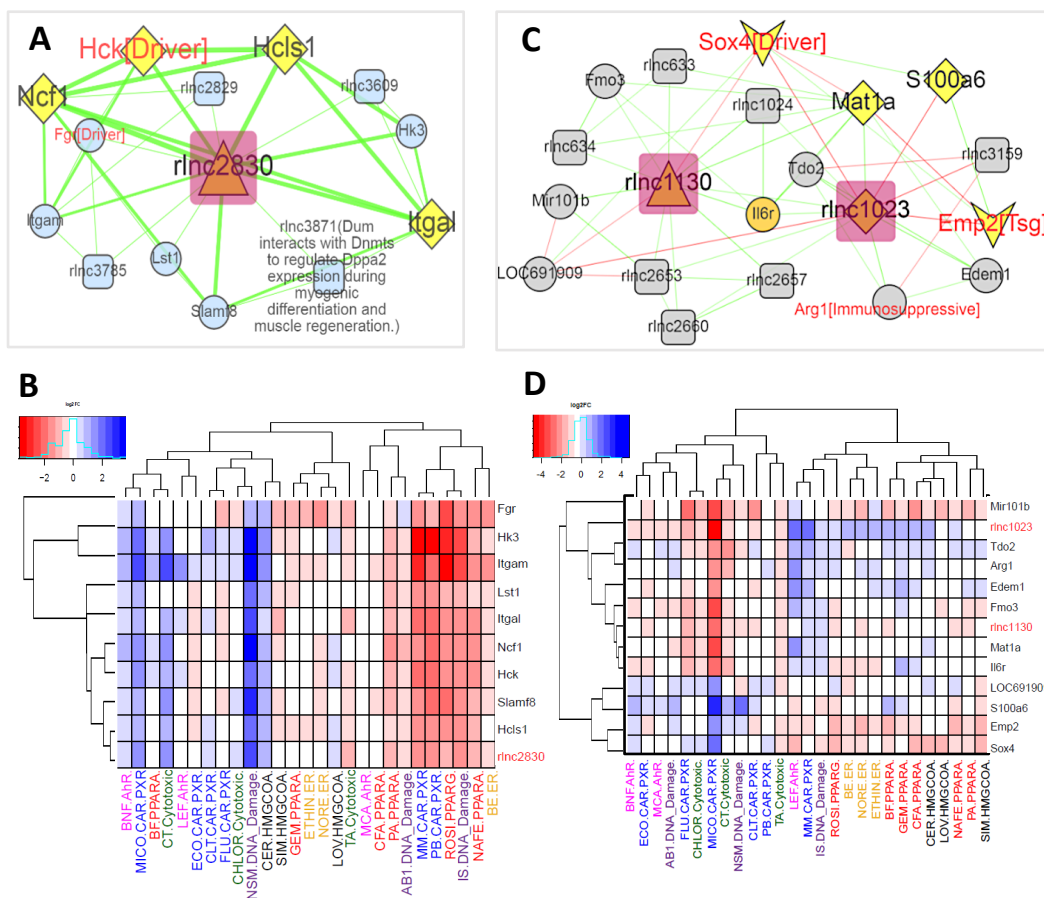





Figure 8

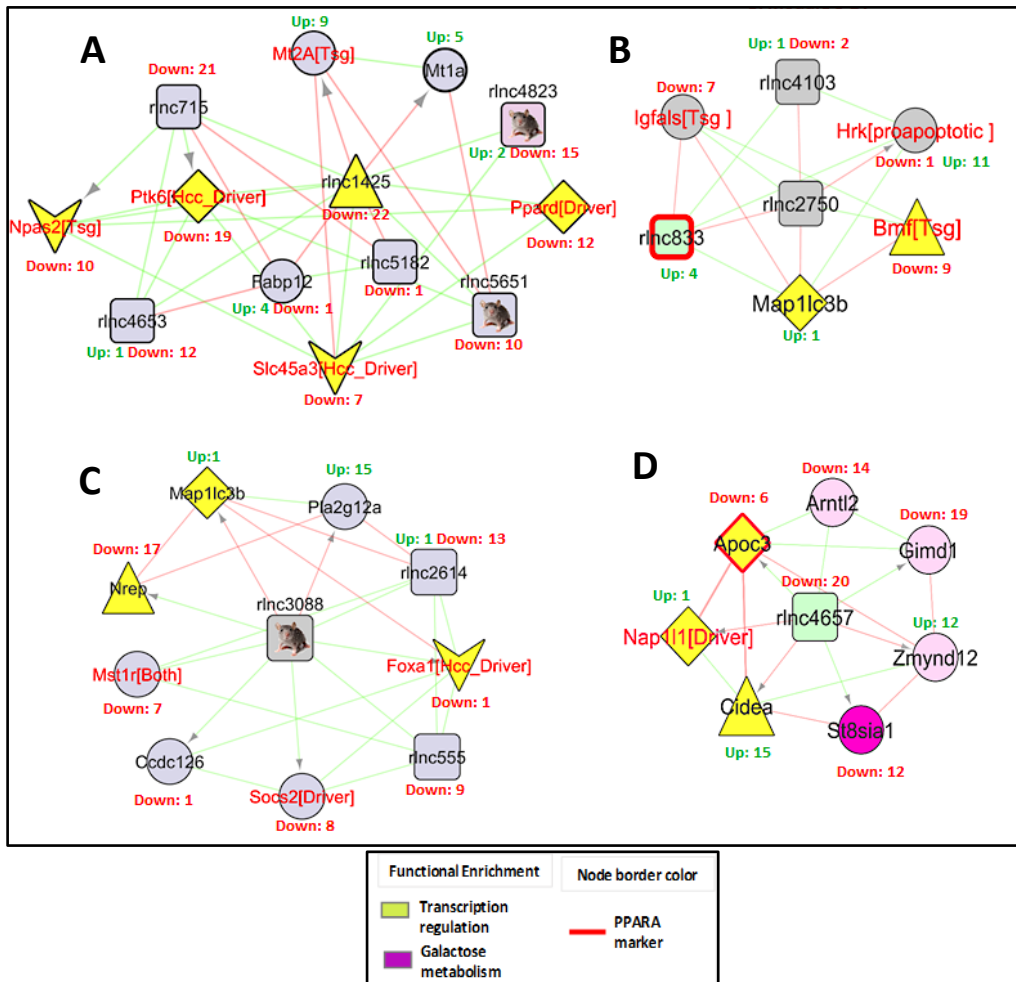

Figure S1

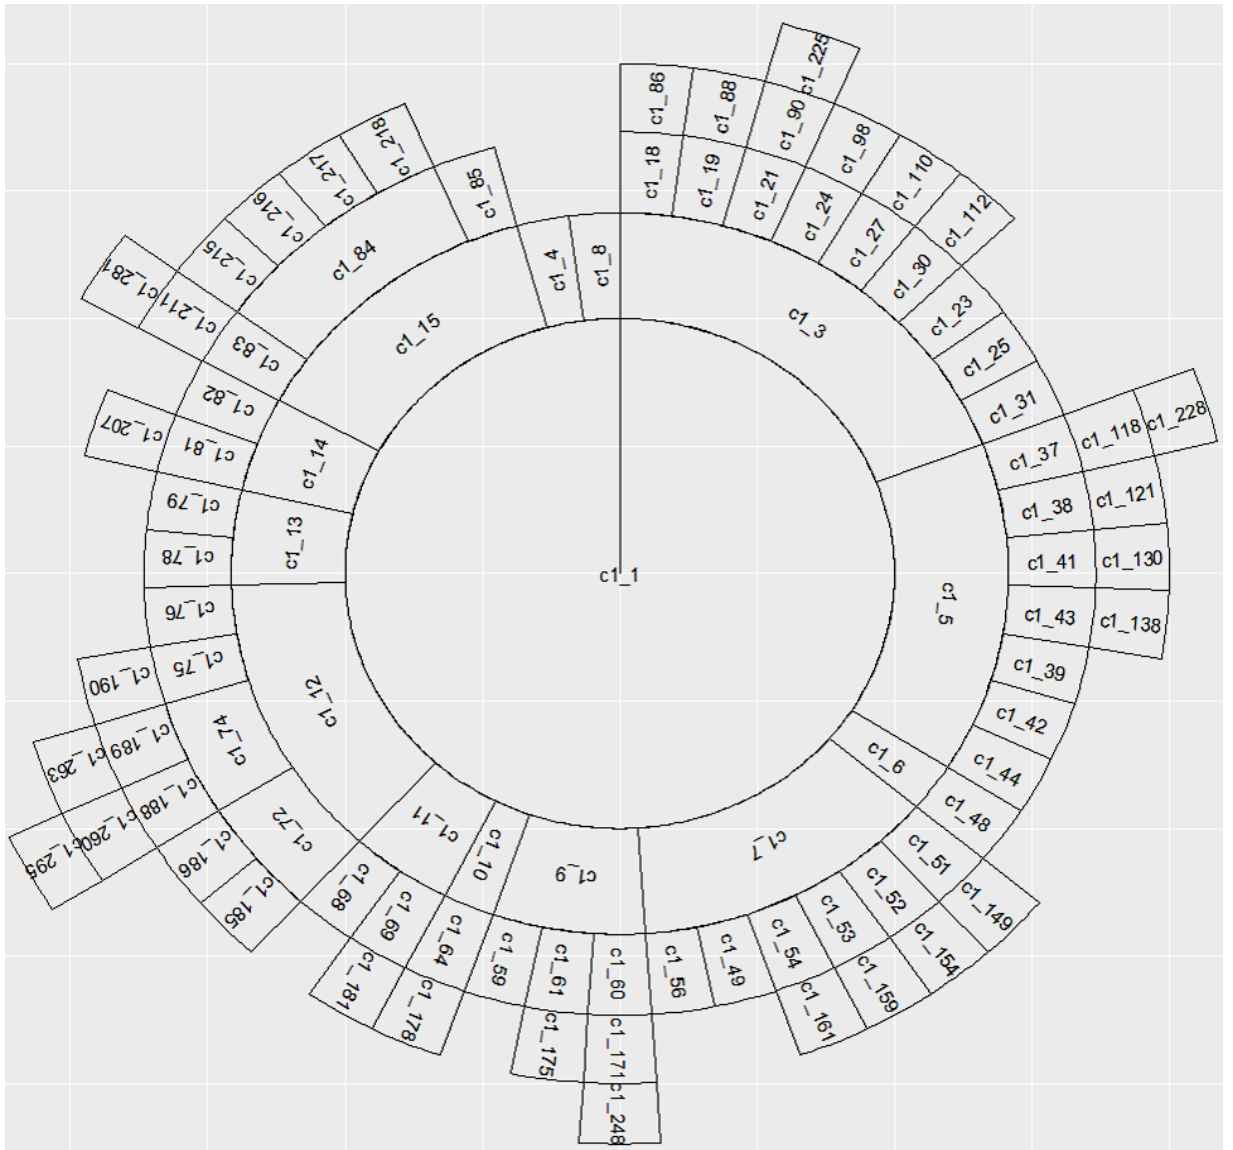

**Figure S2A**

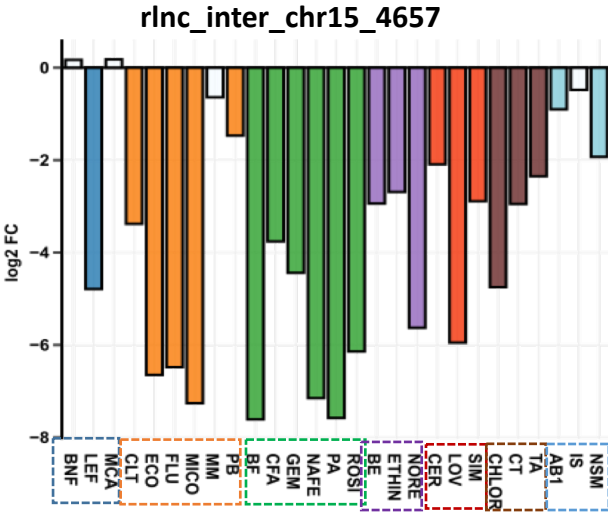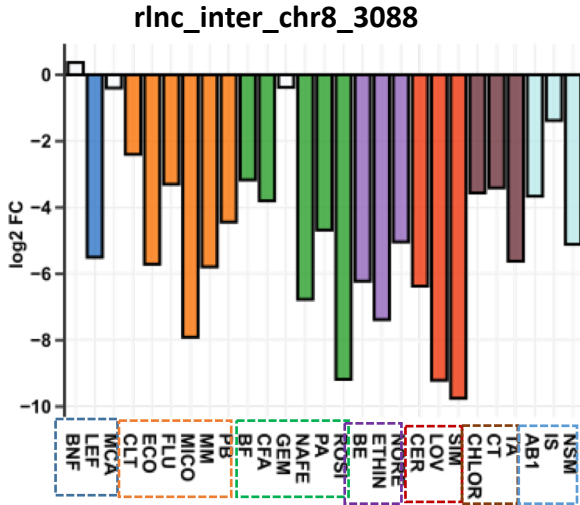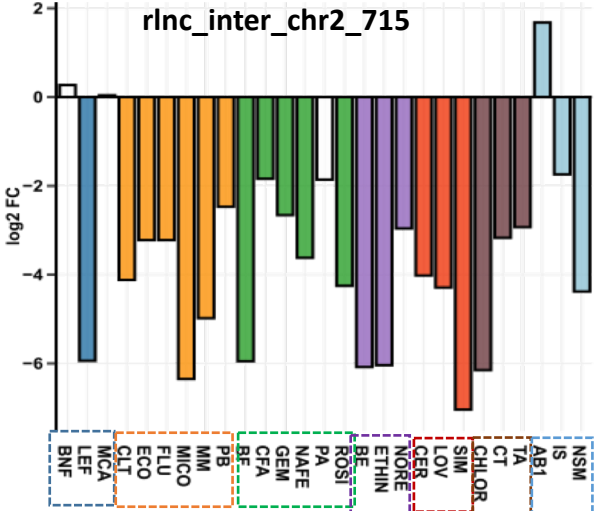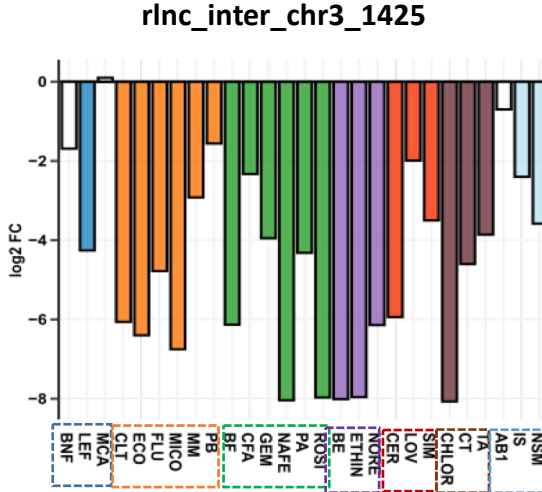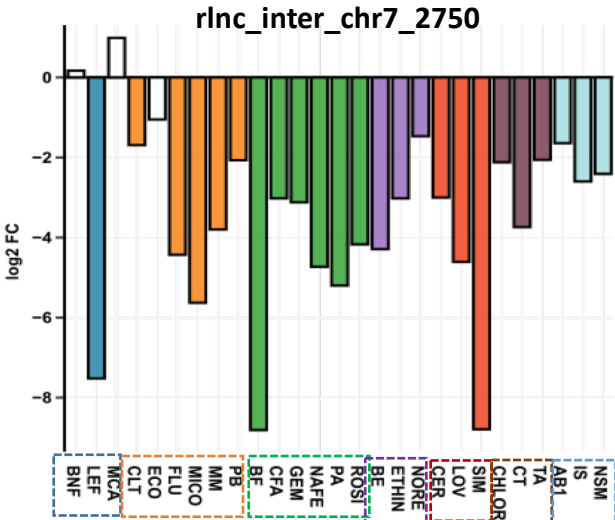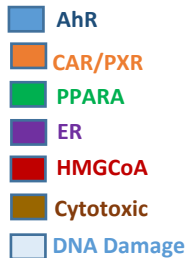

Figure S2B

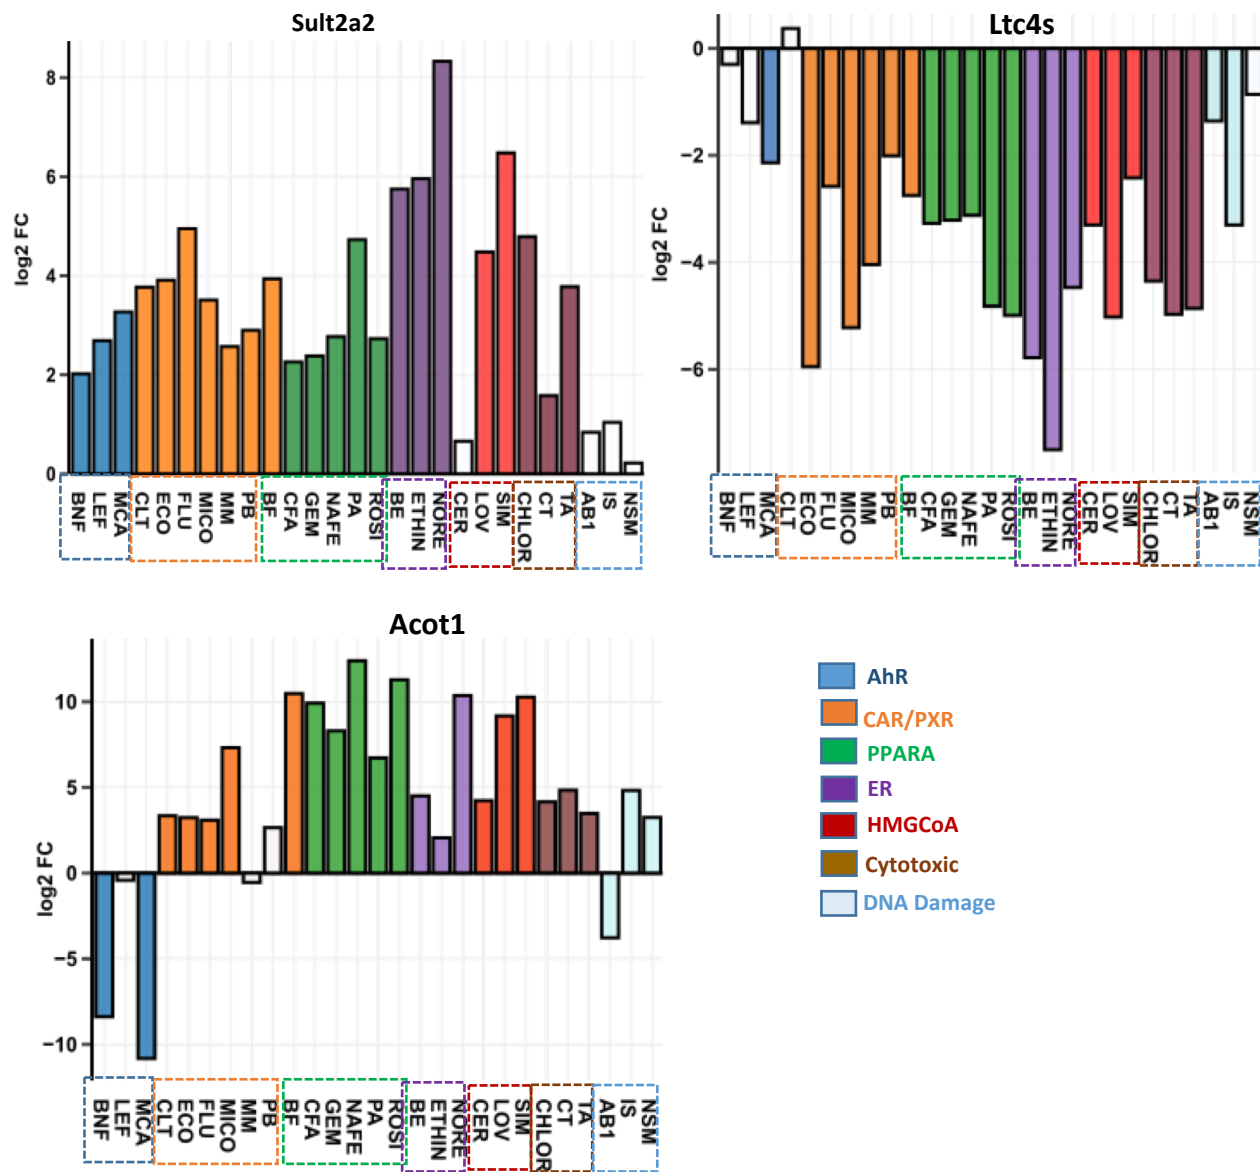

# Figure S3

## A. Gene expression markers for different toxicological MOAs

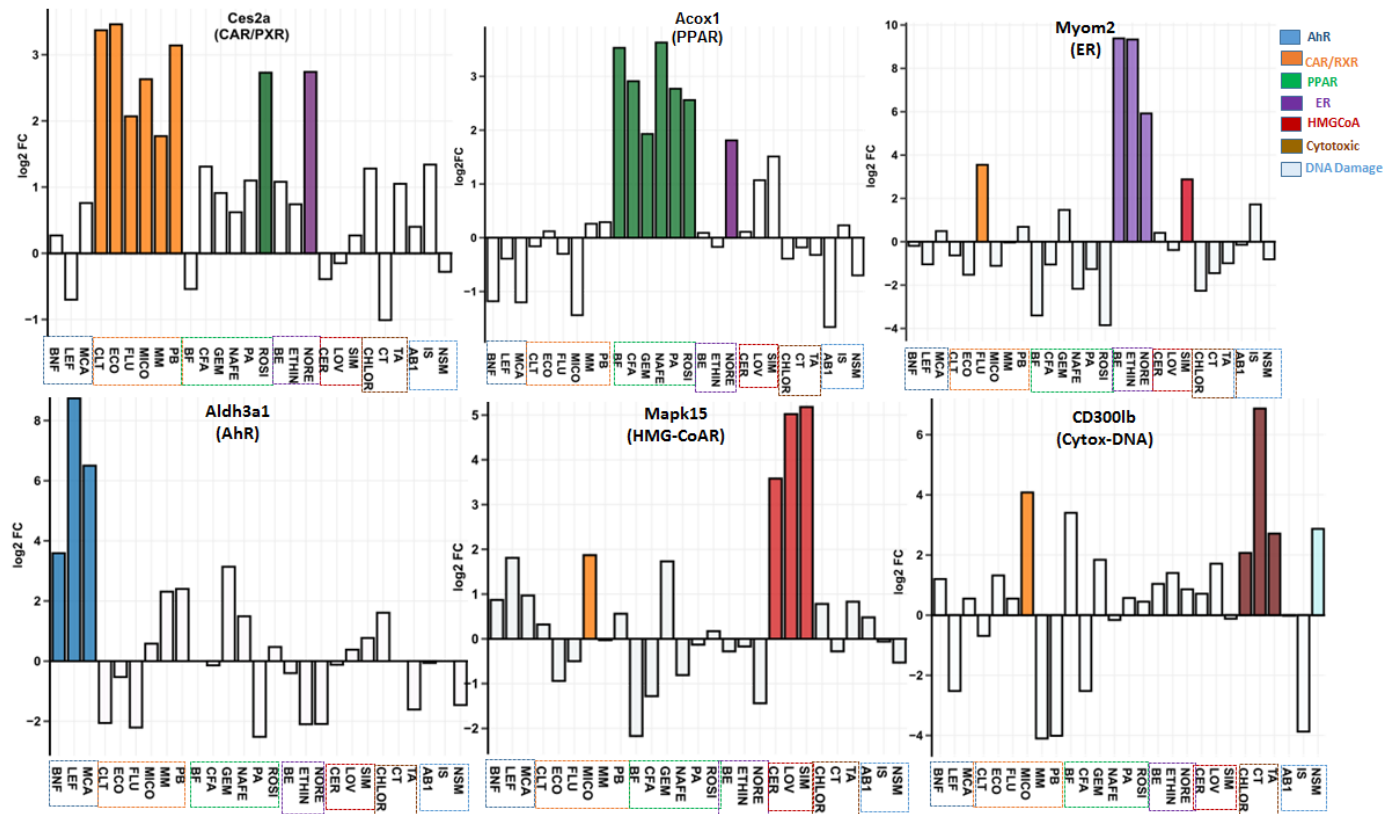

## B. lncRNA expression markers for different toxicological MOAs

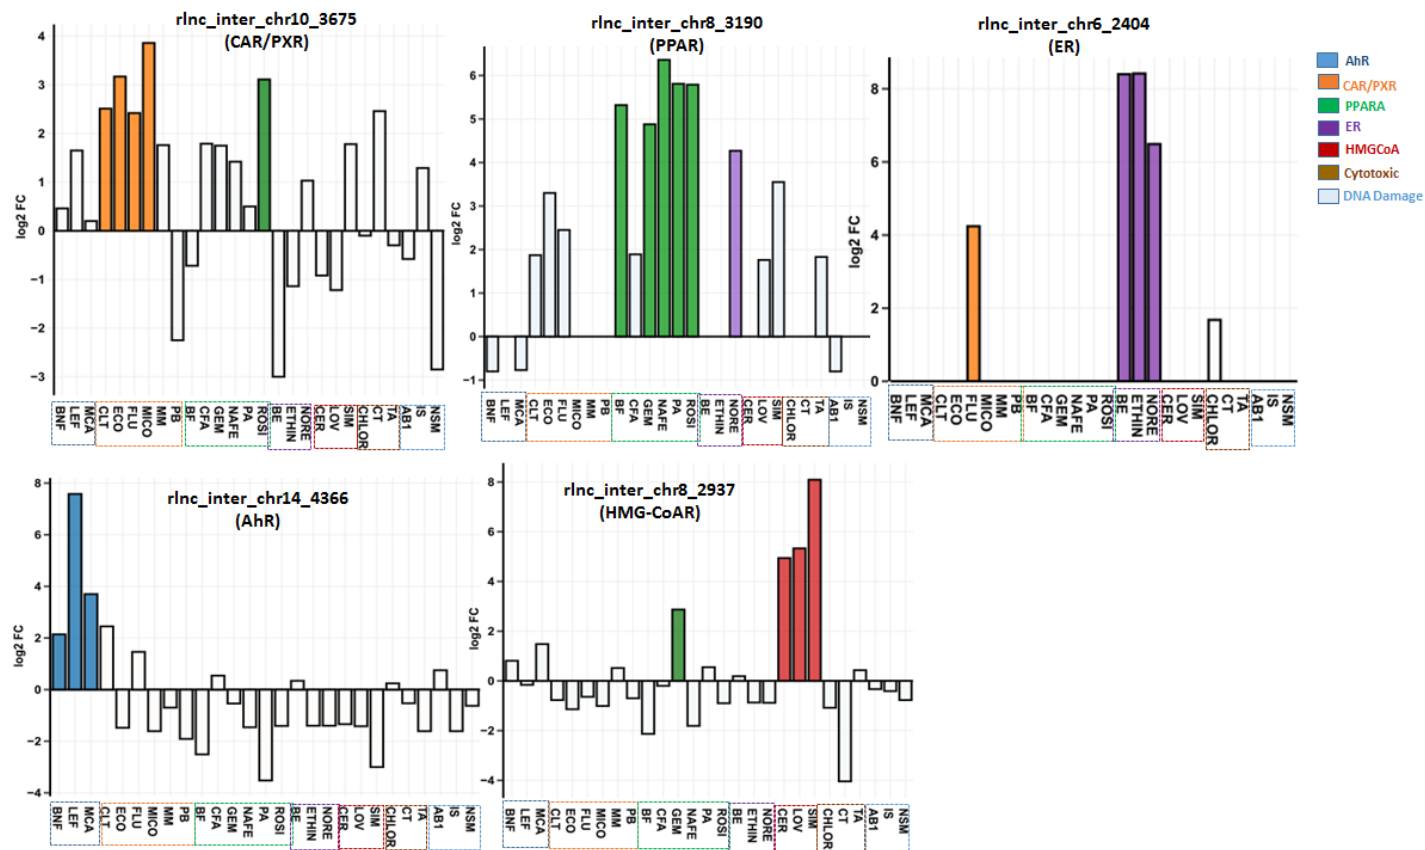

Figure S4A

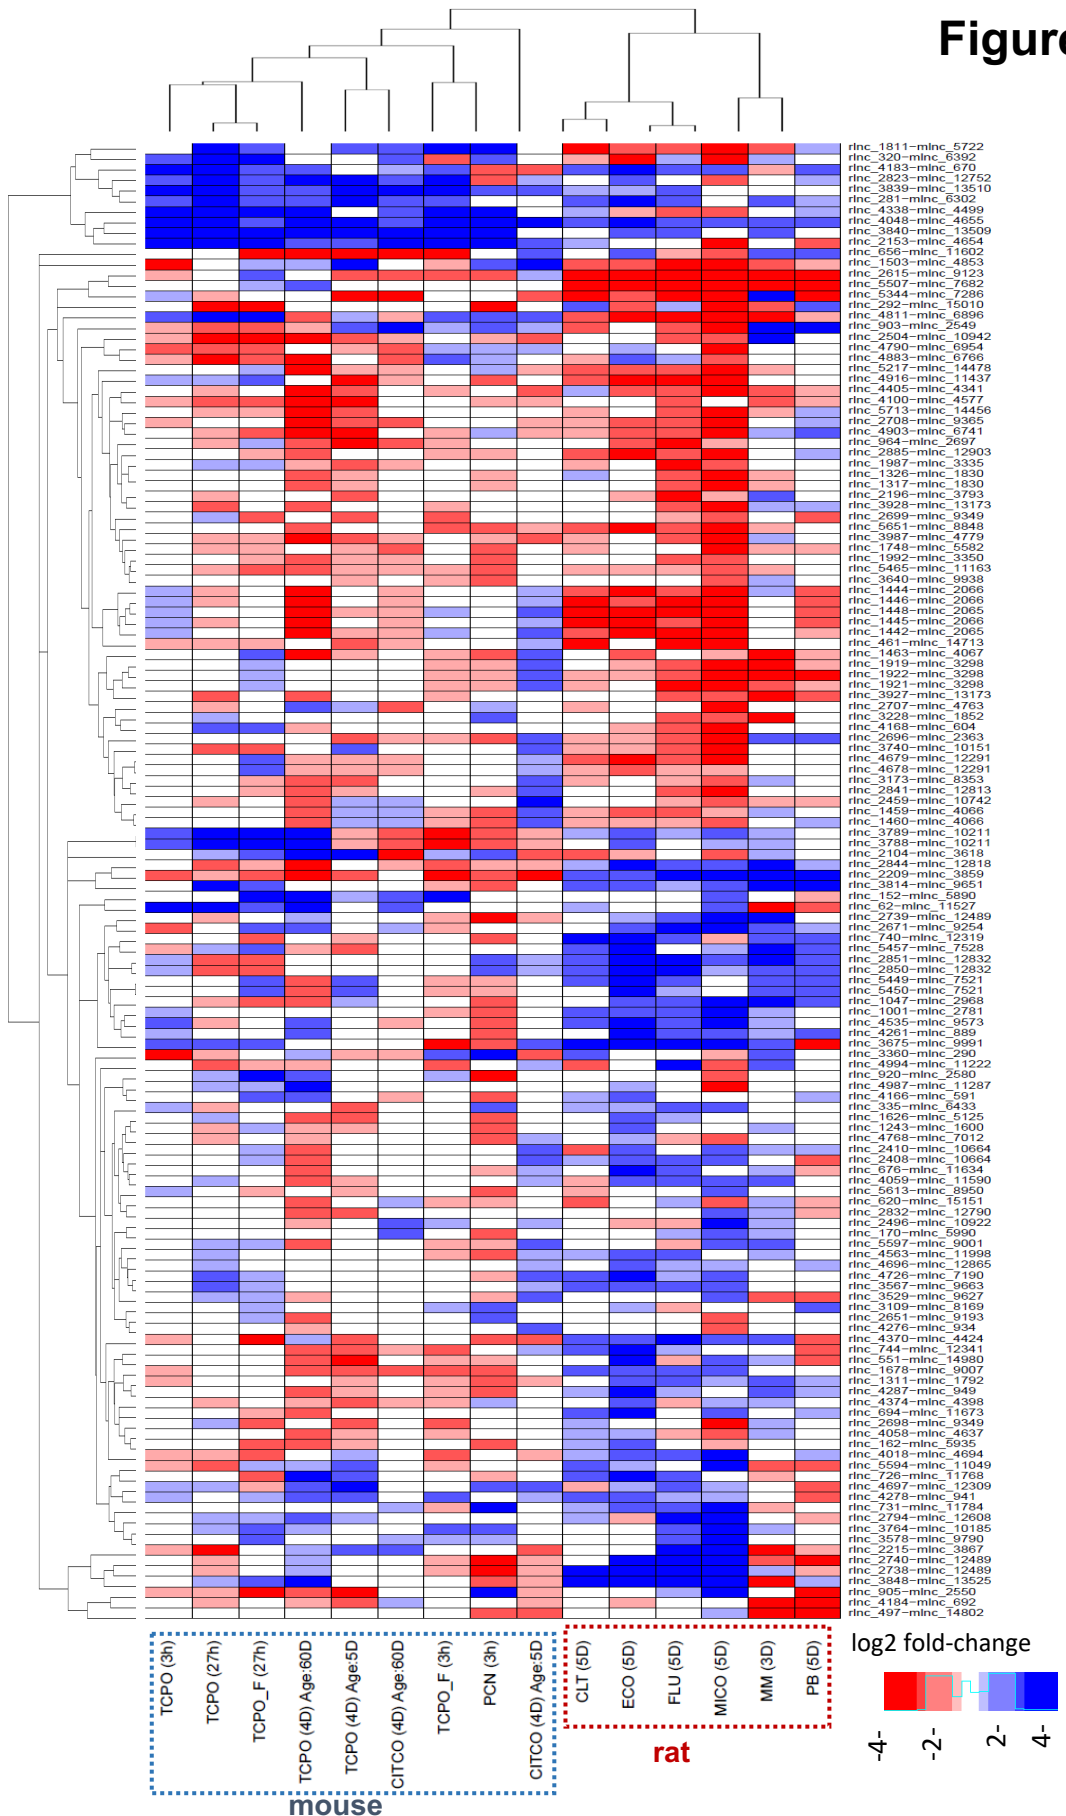

# Figure S4B

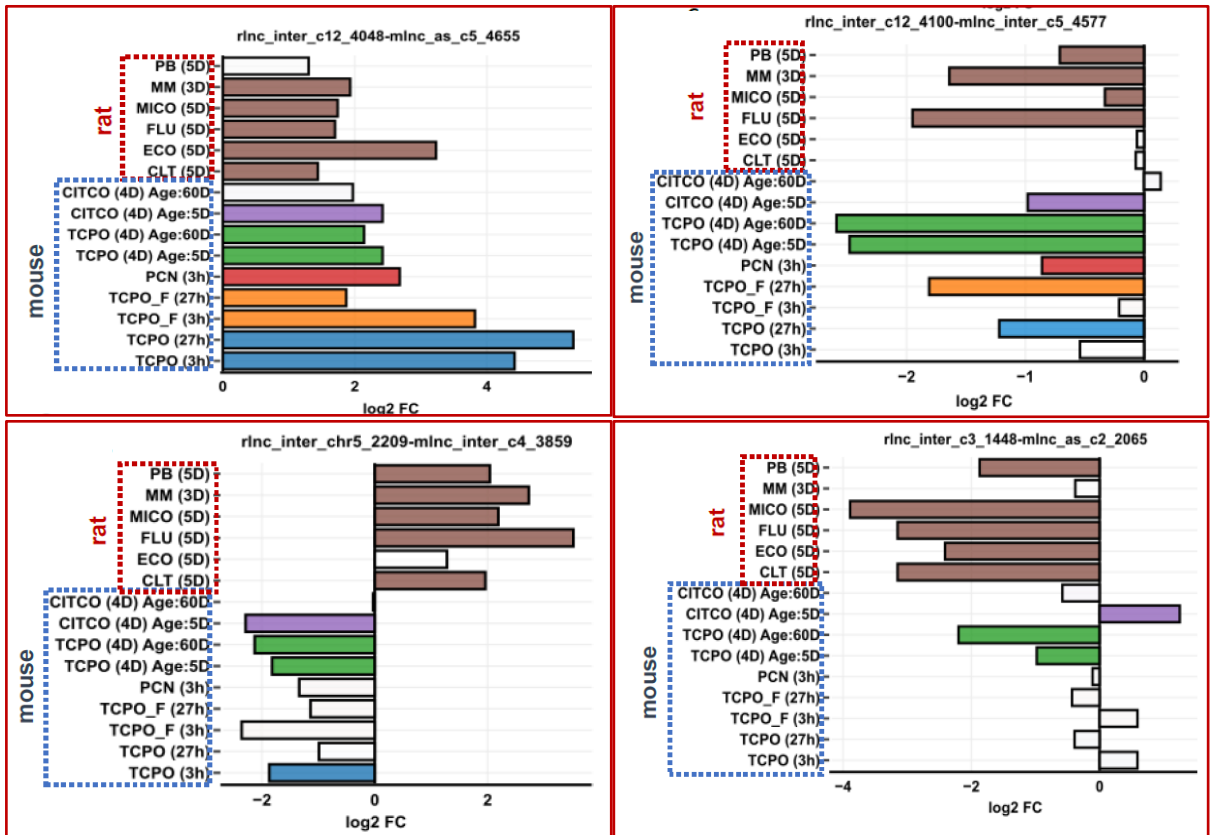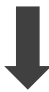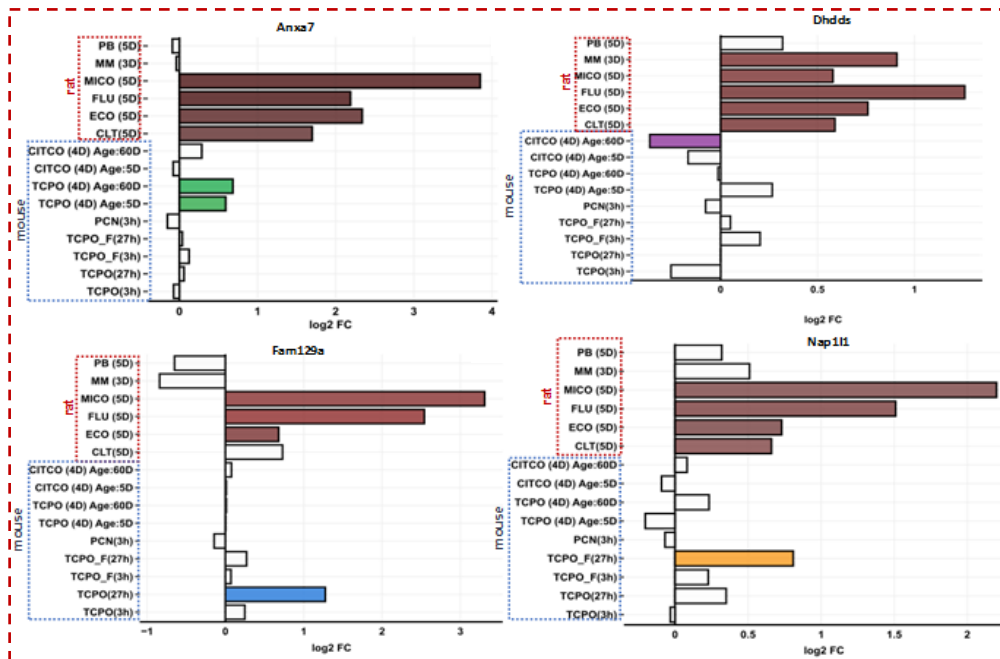



# Figure S5

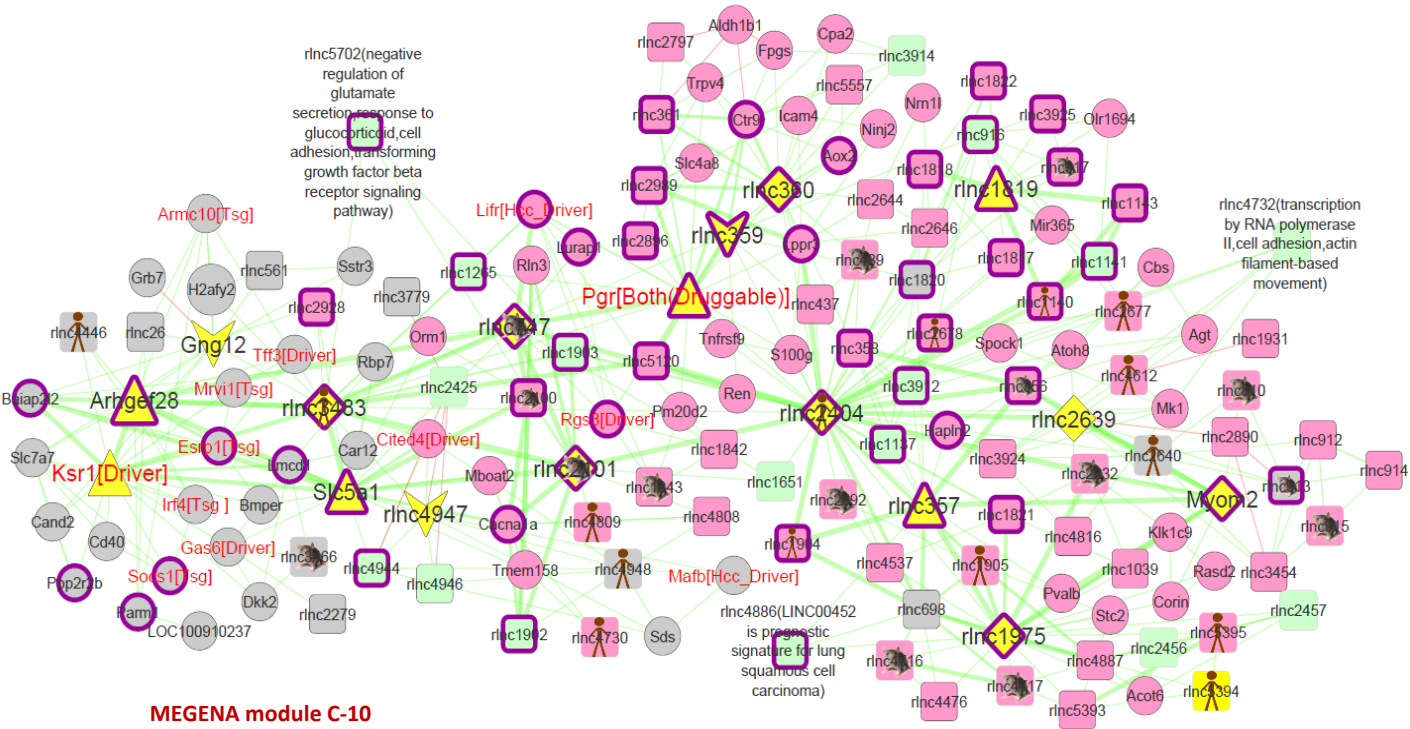

| Node Type   | Node color      | Node width color |
|-------------|-----------------|------------------|
| PCG         | Grey            | Black            |
| Module C-10 | Light Green     | Black            |
| IncRNA      | Pink            | Black            |
|             | Sub module C-64 | Black            |
|             |                 | ER marker        |

**Ortholog symbols**

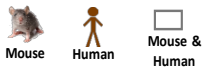

**Node Shape**

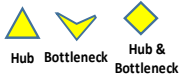

**Cancer gene labels**

- Tsg:** Tumor suppressor gene
- HCC driver:** Hepatic onco-driver
- Driver:** Onco-driver
- Both:** Driver & TSF
- Druggable:** FDA approved targets



MEGENA module C-13 Oncogenic sub-network

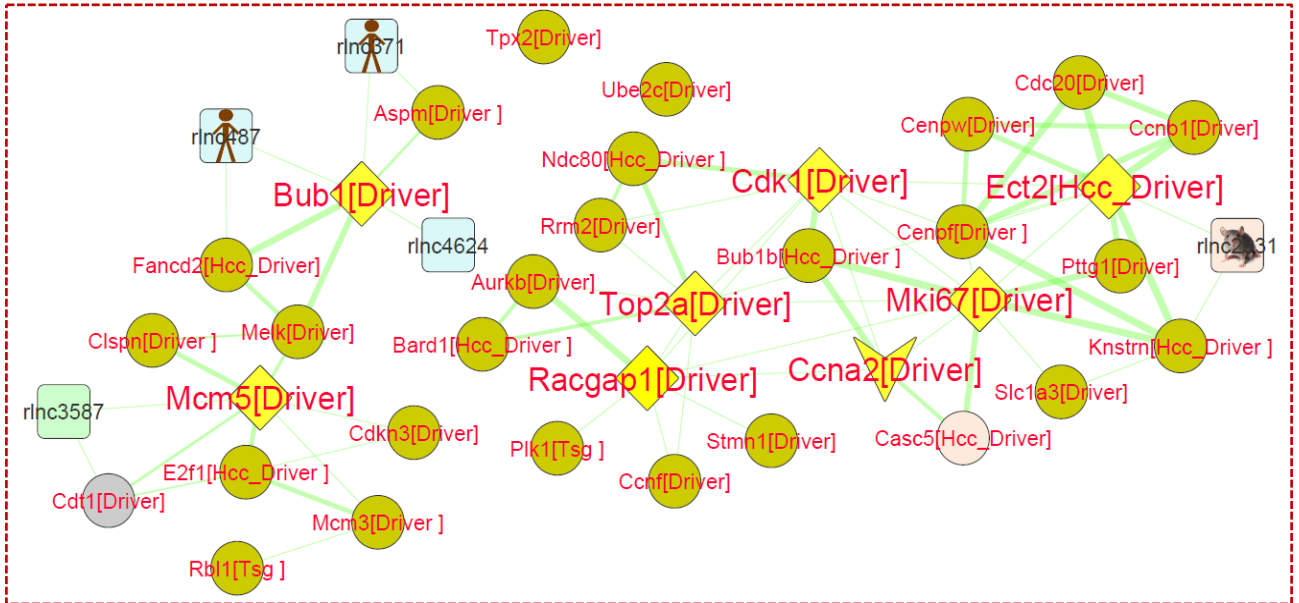

| Node Type                                                           | Node color            | Node Shape                                                                                                                                                                       |
|---------------------------------------------------------------------|-----------------------|----------------------------------------------------------------------------------------------------------------------------------------------------------------------------------|
| PCG                                                                 | Module C-13           | Hub                                                                                                                                                                              |
| lncRNA                                                              | Sub module C-78       | Bottleneck                                                                                                                                                                       |
|                                                                     | Sub module C-79       | Hub & Bottleneck                                                                                                                                                                 |
| Ortholog symbols                                                    | Functional Enrichment | Cancer gene labels                                                                                                                                                               |
| Mouse                      Human                      Mouse & Human | Cell division         | <b>Tsg:</b> Tumor suppressor gene<br><b>HCC driver:</b> Hepatic onco-driver<br><b>Driver:</b> Onco-driver<br><b>Both:</b> Driver & TSF<br><b>Druggable:</b> FDA approved targets |

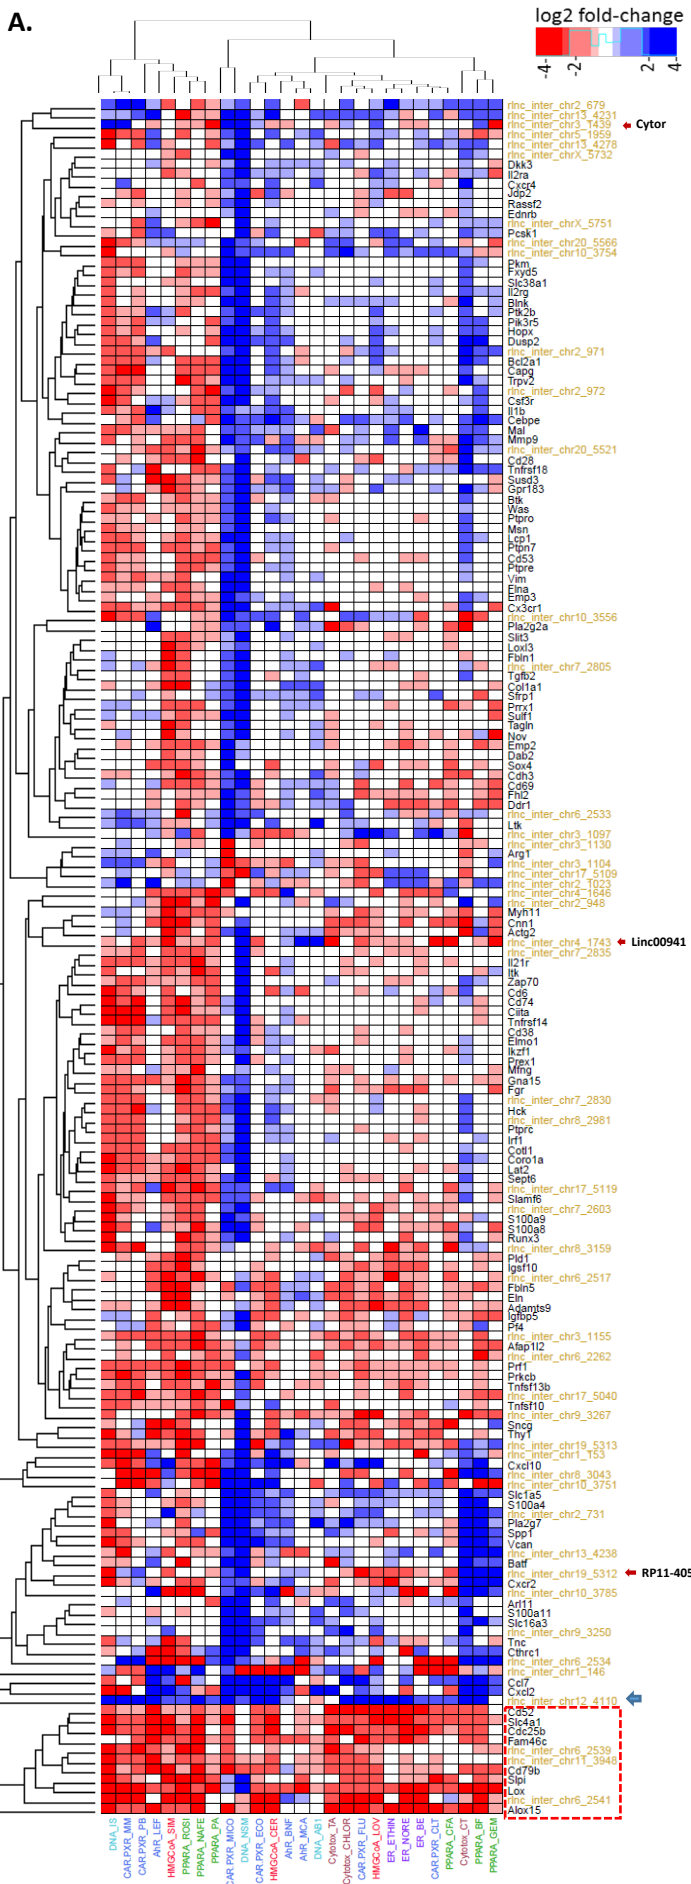

**Figure S8A**

# Figure S8B

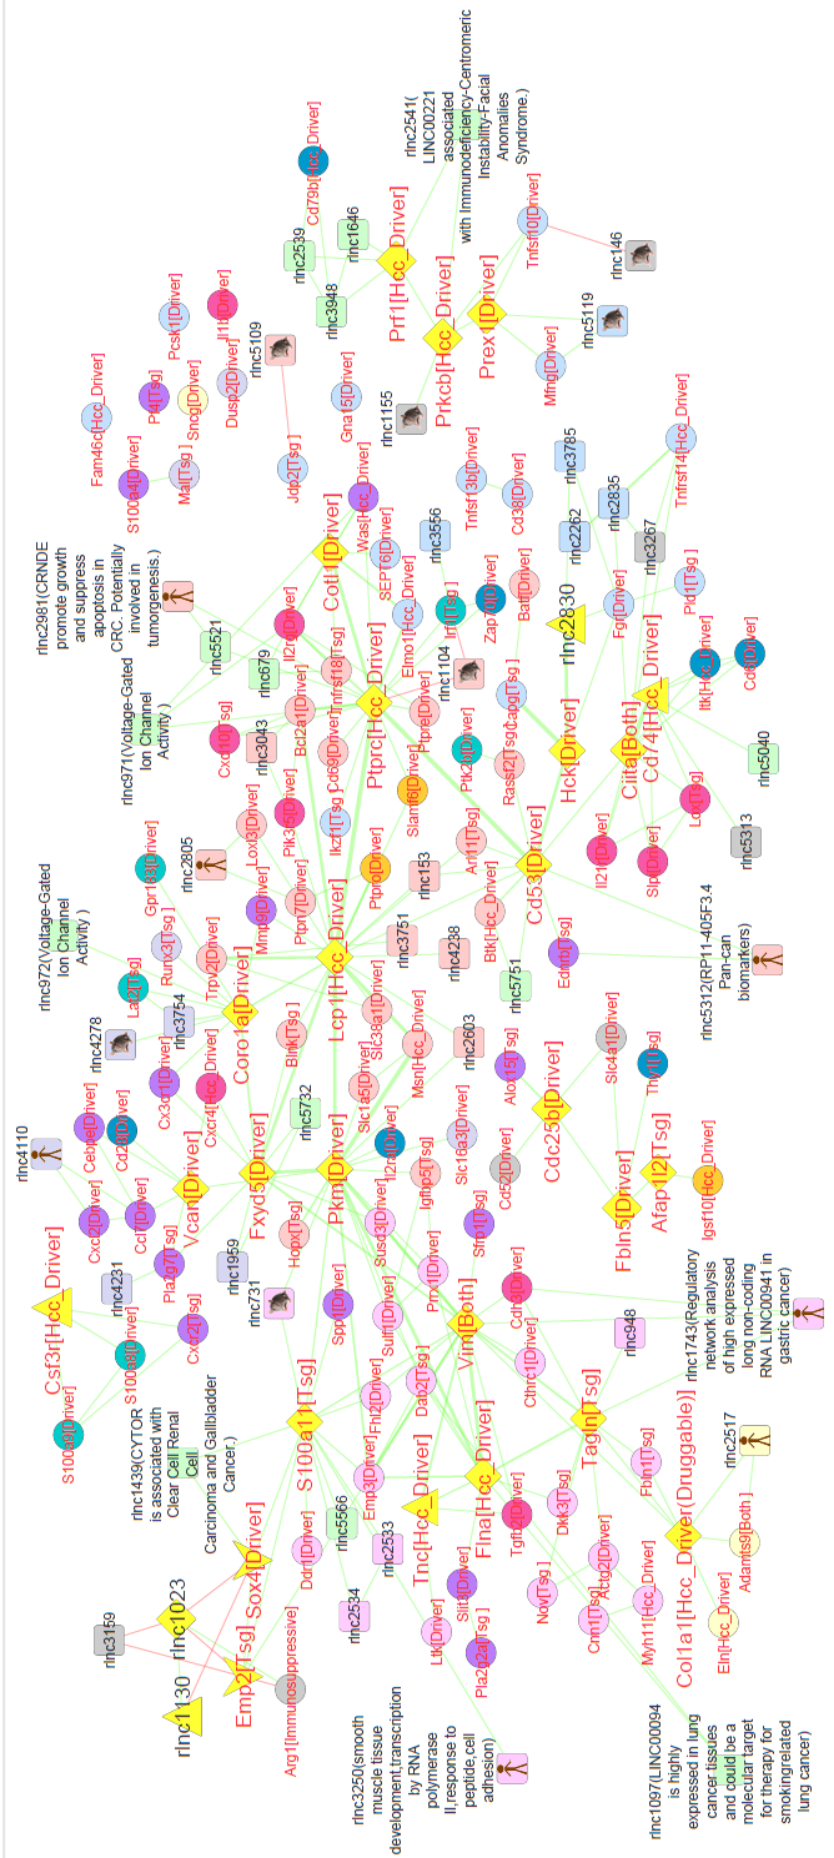

| Node Type | Node color   | Functional Enrichment                | Node Shape       | Orthologous symbols | Cancer gene labels              |
|-----------|--------------|--------------------------------------|------------------|---------------------|---------------------------------|
| PCG       | Grey         | Cytokine, chemokine & MHC processing | Hub              | Mouse               | Tsg: Tumor suppressor gene      |
| lncRNA    | Light Blue   | Innate immunity                      | Bottleneck       | Human               | HCC driver: Hepatic onco-driver |
|           | Light Purple | T cell receptor                      | Hub & Bottleneck | Human               | Driver: Onco-driver             |
|           | Light Blue   | Immunoglobulin                       | Hub & Bottleneck | Human               | Both: Driver & TSF              |
|           | Light Yellow |                                      |                  |                     | Druggable: FDA approved targets |
